# Supplementary material
Source: PubMed Central journal article supplement (PMC5568705)
Supplement: NIHMS73795-supplement-Extended_data.pdf [file NIHMS73795-supplement-Extended_data.pdf]

# Extended data Figure 1

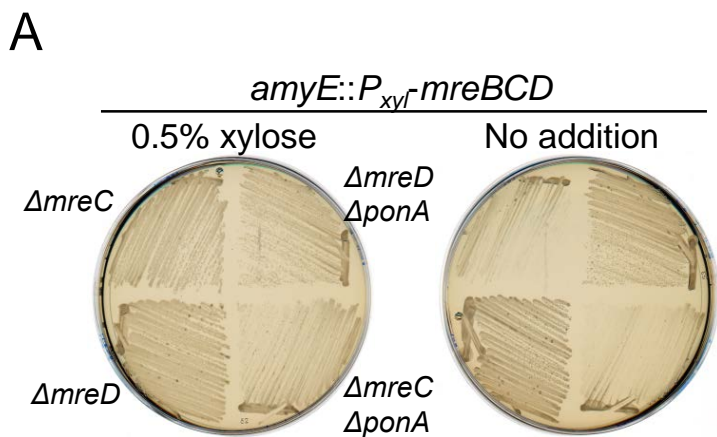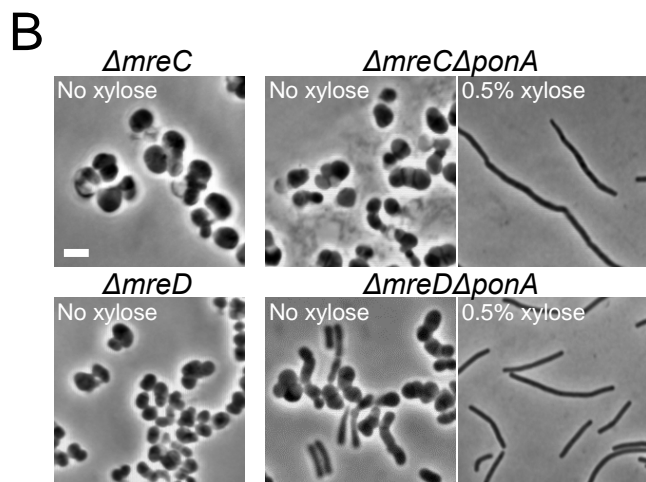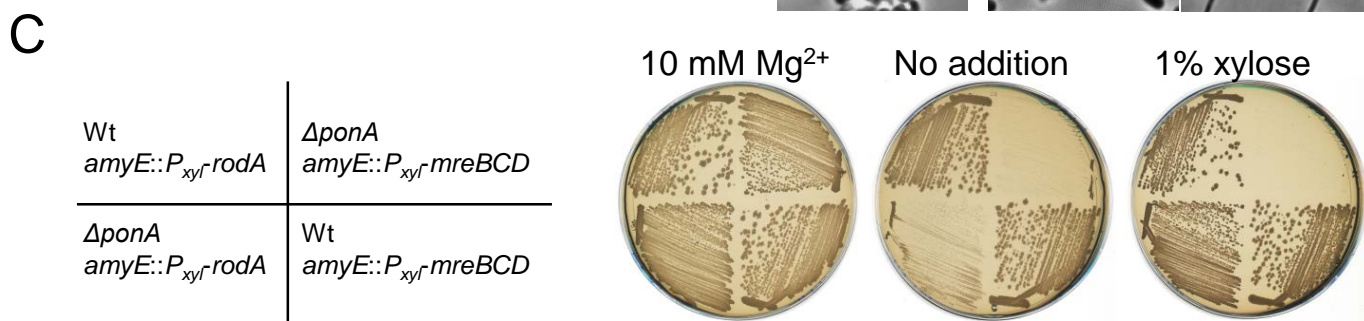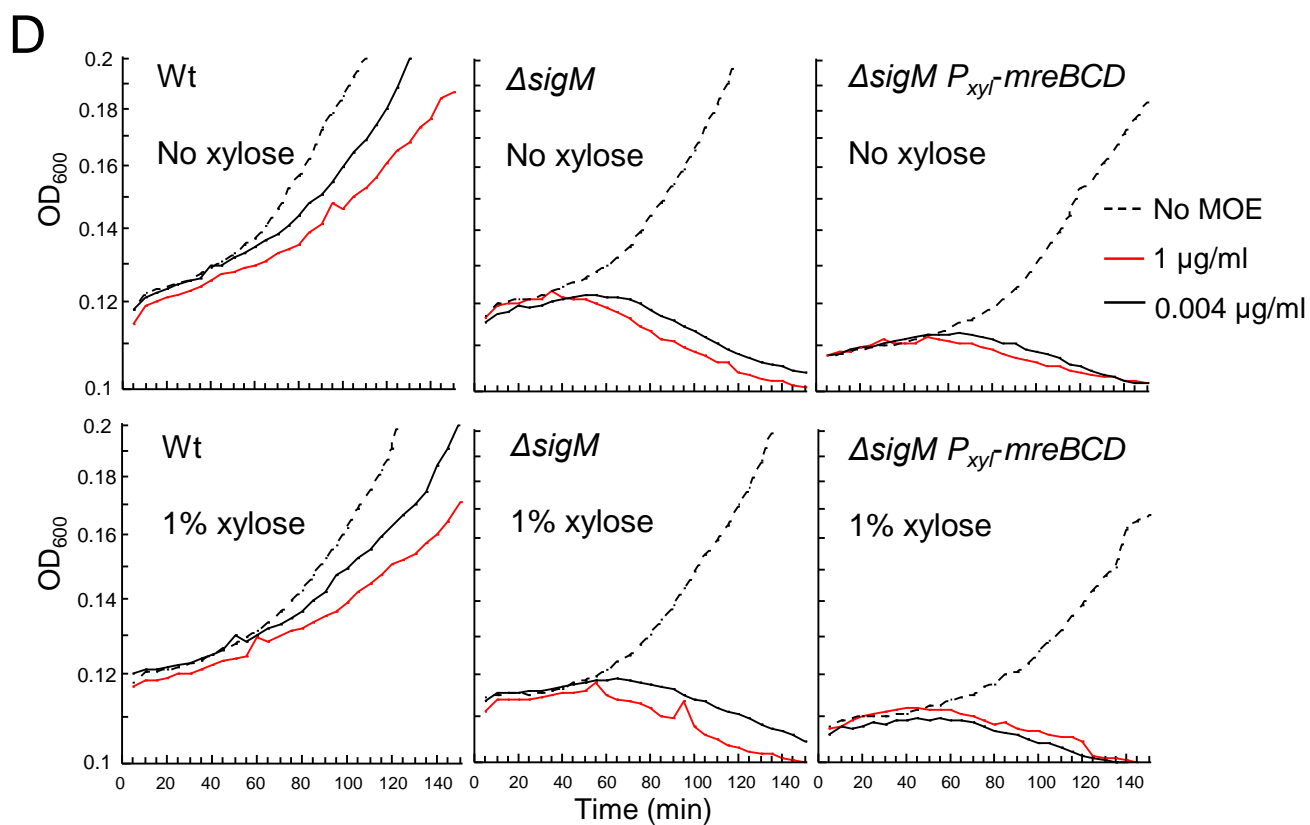

# Extended data Figure 2

WT

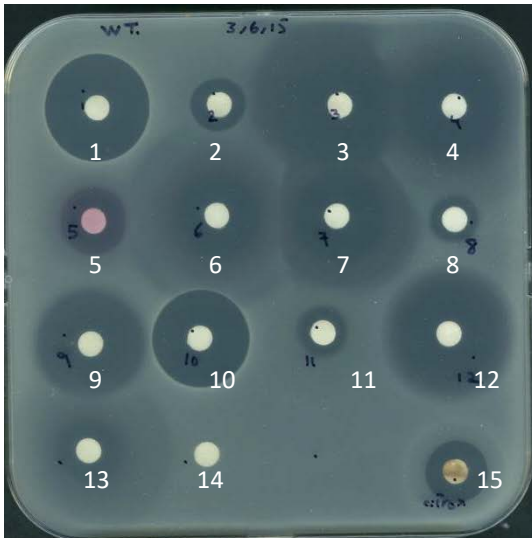

$\Delta 4$

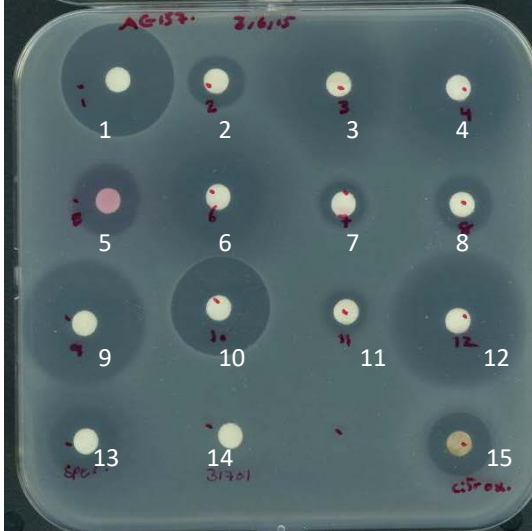

|    | Antibiotic      |
|----|-----------------|
| 1  | Ampicillin      |
| 2  | Bacitracin      |
| 3  | Cefoxitin       |
| 4  | Chloramphenicol |
| 5  | Doxorubicin     |
| 6  | Erythromycin    |
| 7  | Kanamycin       |
| 8  | Nalidixic acid  |
| 9  | Nystatin        |
| 10 | Penicillin      |
| 11 | Tetracycline    |
| 12 | Triclosan       |
| 13 | Spectinomycin   |
| 14 | Control         |
| 15 | Citrox          |

# Extended data Figure 3

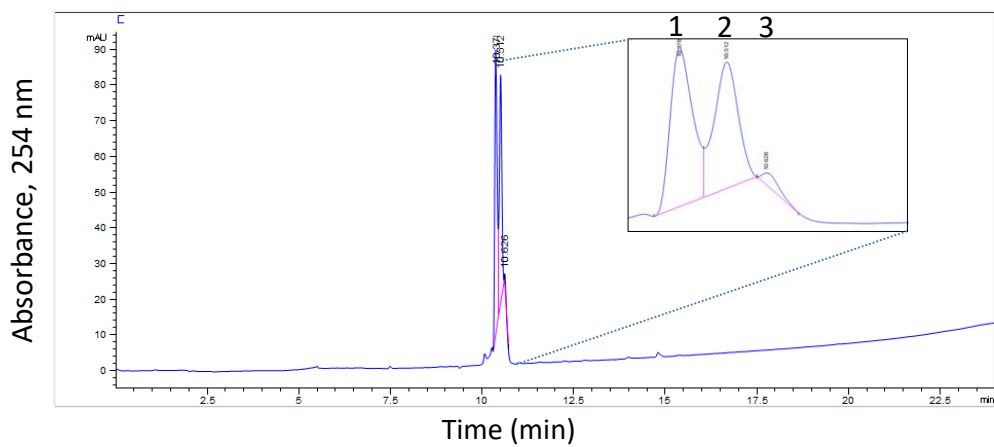

# Extended data Figure 4

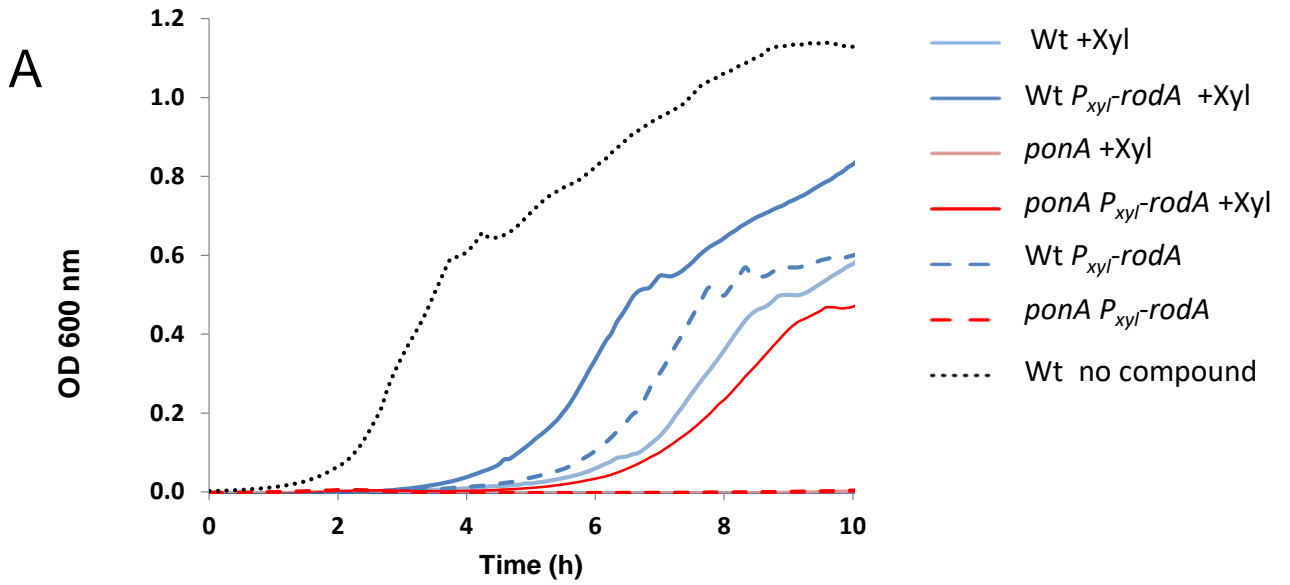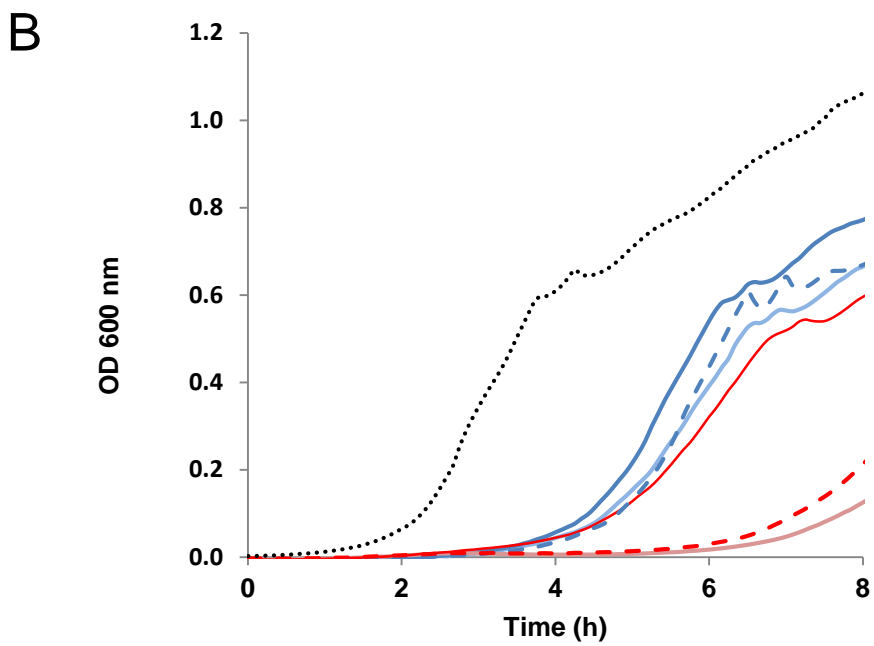

**Extended data Table 1. Candidates for the missing GTase gene<sup>a</sup>.**

| <b>Gene</b>  | <b>BSU code<sup>a</sup></b> | <b>Operon structure<sup>b</sup></b> | <b><math>\sigma^M</math><sup>c</sup></b> | <b>MOE<sup>d</sup></b> | <b>Fi in <math>\Delta 4</math> / WT<sup>e</sup></b> | <b>MOE-growth assays<sup>f</sup></b> | <b>Known or possible function</b> |
|--------------|-----------------------------|-------------------------------------|------------------------------------------|------------------------|-----------------------------------------------------|--------------------------------------|-----------------------------------|
| <i>divIC</i> | BSU00620                    |                                     | +                                        | +                      |                                                     | <b>Essential</b>                     | Unknown (cell division)           |
| <i>tilS</i>  | BSU00670                    | <i>tilS hprT ftsH coaX yacC</i>     | +                                        | +                      |                                                     | <b>Essential</b>                     | tRNA modification                 |
| <i>hprT</i>  | BSU00680                    | <i>tilS hprT ftsH coaX yacC</i>     | +                                        |                        |                                                     | <b>Essential</b>                     | Nucleotide metabolism             |
| <i>ftsH</i>  | BSU00690                    | <i>tilS hprT ftsH coaX yacC</i>     | +                                        |                        |                                                     |                                      | Protease                          |
| <i>coaX</i>  | BSU00700                    | <i>tilS hprT ftsH coaX yacC</i>     | +                                        |                        | 2.2                                                 |                                      | Coenzyme A synthesis              |
| <i>yacC</i>  | BSU00710                    | <i>tilS hprT ftsH coaX yacC</i>     | +                                        |                        | 2.8                                                 | Tested                               | Unknown                           |
| <i>disA</i>  | BSU00880                    | <i>disA yacL ispDF</i>              | +                                        | +                      |                                                     |                                      | Diadenylate cyclase               |
| <i>yacL</i>  | BSU00890                    | <i>disA yacL ispDF</i>              | +                                        |                        |                                                     | Tested                               | Unknown                           |
| <i>ispD</i>  | BSU00900                    | <i>disA yacL ispDF</i>              | +                                        |                        |                                                     | <b>Essential</b>                     | Lipid II synthesis                |
| <i>ispF</i>  | BSU00910                    | <i>disA yacL ispDF</i>              | +                                        |                        |                                                     | <b>Essential</b>                     | Lipid II synthesis                |
| <i>yceC</i>  | BSU02890                    | <i>yceCDEFGH</i>                    | +                                        | +                      |                                                     | Tested                               | Unknown                           |
| <i>yceD</i>  | BSU02900                    | <i>yceCDEFGH</i>                    | +                                        | +                      |                                                     | Tested                               | Unknown                           |
| <i>yceE</i>  | BSU02910                    | <i>yceCDEFGH</i>                    | +                                        |                        |                                                     | Tested                               | Unknown                           |
| <i>yceF</i>  | BSU02920                    | <i>yceCDEFGH</i>                    | +                                        |                        |                                                     | Tested                               | Unknown                           |
| <i>yceG</i>  | BSU02930                    | <i>yceCDEFGH</i>                    | +                                        |                        | 1.4                                                 | Tested                               | Unknown                           |
| <i>yceH</i>  | BSU02940                    | <i>yceCDEFGH</i>                    | +                                        |                        |                                                     | Tested                               | Unknown                           |
| <i>ycgQ</i>  | BSU03240                    | <i>ycgQ ycgR</i>                    | +                                        | +                      | 5.7                                                 | Tested                               | Unknown                           |
| <i>ycgR</i>  | BSU03250                    | <i>ycgQ ycgR</i>                    | +                                        | +                      | 13.6                                                | Tested                               | Unknown                           |
| <i>amj</i>   | BSU04230                    |                                     | +                                        | +                      | 12.2                                                | Tested                               | Lipid II flipping                 |
| <i>ddl</i>   | BSU04560                    | <i>ddl murF</i>                     | +                                        |                        |                                                     | <b>Essential</b>                     | Lipid II synthesis                |
| <i>murF</i>  | BSU04570                    | <i>ddl murF</i>                     | +                                        |                        |                                                     | <b>Essential</b>                     | Lipid II synthesis                |
| <i>ydcA</i>  | BSU04610                    |                                     |                                          | +                      |                                                     | Tested                               | Unknown                           |
| <i>ydfM</i>  | BSU05470                    |                                     |                                          |                        | 20.5                                                | Tested                               | Unknown                           |
| <i>yebC</i>  | BSU06380                    |                                     | +                                        | +                      | 23.9                                                | Tested                               | Unknown                           |
| <i>ltaSA</i> | BSU07260                    |                                     | +                                        | +                      | 9.7                                                 | Tested                               | Lipoteichoic acid synthesis       |
| <i>yfiC</i>  | BSU08220                    |                                     |                                          | +                      |                                                     | Tested                               | Unknown                           |
| <i>yfiN</i>  | BSU08330                    |                                     |                                          |                        | 21.5                                                | Tested                               | Unknown                           |

| Gene         | BSU code <sup>a</sup> | Operon structure <sup>b</sup> | $\sigma^M$ <sup>c</sup> | MOE <sup>d</sup> | Fi in $\Delta 4$ / WT <sup>e</sup> | MOE-growth assays <sup>f</sup> | Known or possible function |
|--------------|-----------------------|-------------------------------|-------------------------|------------------|------------------------------------|--------------------------------|----------------------------|
| <i>yhbI</i>  | BSU08990              |                               |                         |                  | 69.9                               | Tested                         | Unknown                    |
| <i>yhdK</i>  | BSU09500              | <i>sigM yhdL yhdK</i>         | +                       | +                | 4.7                                |                                | $\sigma^M$ regulation      |
| <i>yhdL</i>  | BSU09510              | <i>sigM yhdL yhdK</i>         | +                       | +                | 5.1                                | <b>Essential</b>               | $\sigma^M$ regulation      |
| <i>sigM</i>  | BSU09520              | <i>sigM yhdL yhdK</i>         | +                       | +                | 29.6                               | Tested                         | Transcriptional regulation |
| <i>yjbC</i>  | BSU11490              | <i>yjbC spx</i>               | +                       |                  |                                    | Tested                         | Unknown                    |
| <i>spx</i>   | BSU11500              | <i>yjbC spx</i>               | +                       |                  |                                    |                                | Transcriptional regulation |
| <i>abh</i>   | BSU14480              |                               | +                       | +                | 1.7                                | Tested                         | Transcriptional regulation |
| <i>ylaA</i>  | BSU14710              |                               |                         | +                | 1.9                                | Tested                         | Unknown                    |
| <i>ylzH</i>  | BSU15069              |                               |                         |                  | 13.1                               | Tested                         | Unknown                    |
| <i>murG</i>  | BSU15220              | <i>murGB divIB ylxWX sbp</i>  | +                       | +                | 14.3                               | <b>Essential</b>               | Lipid II synthesis         |
| <i>murB</i>  | BSU15230              | <i>murGB divIB ylxWX sbp</i>  | +                       | +                | 12.1                               | <b>Essential</b>               | Lipid II synthesis         |
| <i>divIB</i> | BSU15240              | <i>murGB divIB ylxWX sbp</i>  | +                       | +                | 5.9                                | <b>Essential</b>               | Unknown (cell division)    |
| <i>ylxW</i>  | BSU15250              | <i>murGB divIB ylxWX sbp</i>  | +                       | +                | 4.5                                | Tested                         | Unknown                    |
| <i>ylxX</i>  | BSU15260              | <i>murGB divIB ylxWX sbp</i>  | +                       | +                | 3.4                                | Tested                         | Unknown                    |
| <i>sbp</i>   | BSU15270              | <i>murGB divIB ylxWX sbp</i>  | +                       | +                |                                    | Tested                         | Unknown                    |
| <i>pbpX</i>  | BSU16950              |                               | +                       | +                | 2.3                                |                                | PG turnover                |
| <i>yngC</i>  | BSU18190              |                               | +                       |                  | 2.9                                | Tested                         | Unknown                    |
| <i>metA</i>  | BSU21910              | <i>metA ugtP</i>              | +                       |                  | -1.8                               |                                | Methionine synthesis       |
| <i>ugtP</i>  | BSU21920              | <i>metA ugtP</i>              | +                       |                  | 1.5                                |                                | Glucolipid synthesis       |
| <i>recU</i>  | BSU22310              | <i>recU ponA</i>              | +                       | +                | 5.9                                |                                | DNA recombination          |
| <i>ponA</i>  | BSU22320              | <i>recU ponA</i>              | +                       | +                | -186.5                             |                                | PG synthesis               |
| <i>ypbG</i>  | BSU22980              |                               | +                       | +                | 5.0                                | Tested                         | Unknown                    |
| <i>ypuD</i>  | BSU23300              |                               | +                       | +                | 5.1                                | Tested                         | Unknown                    |
| <i>ypuA</i>  | BSU23370              |                               | +                       |                  | 11.0                               | Tested                         | Unknown                    |
| <i>yqiL</i>  | BSU23830              |                               | +                       | +                | 4.0                                | Tested                         | Unknown                    |
| <i>yqiG</i>  | BSU24210              |                               |                         | +                |                                    | Tested                         | Unknown                    |
| <i>yrhL</i>  | BSU27140              |                               |                         | +                | 1.5                                | Tested                         | Unknown                    |
| <i>yrhJ</i>  | BSU27160              | <i>yrhH fatR yrhJ</i>         | +                       | +                | 2.6                                | Tested                         | Unknown                    |
| <i>fatR</i>  | BSU27170              | <i>yrhH fatR yrhJ</i>         | +                       | +                | 1.5                                | Tested                         | Transcriptional regulation |

| Gene         | BSU code <sup>a</sup> | Operon structure <sup>b</sup> | $\sigma^M$ <sup>c</sup> | MOE <sup>d</sup> | Fi in $\Delta 4$ / WT <sup>e</sup> | MOE-growth assays <sup>f</sup> | Known or possible function |
|--------------|-----------------------|-------------------------------|-------------------------|------------------|------------------------------------|--------------------------------|----------------------------|
| <i>yrhH</i>  | BSU27180              | <i>yrhH fatR yrhJ</i>         | +                       | +                | 15.9                               | Tested                         | Unknown                    |
| <i>secDF</i> | BSU27650              |                               | +                       |                  |                                    |                                | Protein secretion          |
| <i>yrzF</i>  | BSU27785              |                               |                         | +                | 2.1                                | Tested                         | Unknown                    |
| <i>minD</i>  | BSU27990              | <i>maf radC mreBCD minCD</i>  | +                       |                  | 3.5                                | Tested                         | Cell division regulation   |
| <i>minC</i>  | BSU28000              | <i>maf radC mreBCD minCD</i>  | +                       | +                | 3.7                                | Tested                         | Cell division regulation   |
| <i>mreD</i>  | BSU28010              | <i>maf radC mreBCD minCD</i>  | +                       | +                | 5.7                                | <b>Essential</b>               | Unknown (cell shape)       |
| <i>mreC</i>  | BSU28020              | <i>maf radC mreBCD minCD</i>  | +                       | +                | 6.2                                | <b>Essential</b>               | Unknown (cell shape)       |
| <i>mreB</i>  | BSU28030              | <i>maf radC mreBCD minCD</i>  | +                       | +                | 5.0                                |                                | Cytoskeleton               |
| <i>radC</i>  | BSU28040              | <i>maf radC mreBCD minCD</i>  | +                       |                  | 7.6                                |                                | DNA repair                 |
| <i>maf</i>   | BSU28050              | <i>maf radC mreBCD minCD</i>  | +                       | +                | 6.8                                |                                | Unknown                    |
| <i>ytpB</i>  | BSU30500              | <i>ytpA ytpB</i>              | +                       |                  |                                    |                                | Unknown                    |
| <i>ytpA</i>  | BSU30510              | <i>ytpA ytpB</i>              | +                       | +                |                                    | Tested                         | Unknown                    |
| <i>yvrD</i>  | BSU33190              |                               |                         | +                |                                    | Tested                         | Unknown                    |
| <i>tagT</i>  | BSU35840              |                               | +                       | +                | 2.3                                | Tested                         | Teichoic acid synthesis    |
| <i>rapD</i>  | BSU36380              |                               | +                       |                  | -1.8                               |                                | Competence regulation      |
| <i>bcrC</i>  | BSU36530              |                               | +                       | +                | 5.7                                | Tested                         | Lipid II recycling         |
| <i>ywnJ</i>  | BSU36540              |                               | +                       | +                | 1.3                                | Tested                         | Unknown                    |
| <i>ywzG</i>  | BSU38018              |                               |                         |                  | 12.7                               | Tested                         | Unknown                    |
| <i>rodA</i>  | BSU38120              |                               | +                       | +                | 4.7                                | <b>Essential</b>               | Unknown (cell shape)       |
| <i>ywbO</i>  | BSU38250              | <i>efeB ywbO</i>              | +                       |                  | -1.4                               | Tested                         | Unknown                    |
| <i>efeB</i>  | BSU38260              | <i>efeB ywbO</i>              | +                       |                  |                                    |                                | Iron uptake                |
| <i>ywbG</i>  | BSU38330              |                               |                         |                  | 16.5                               | Tested                         | Unknown                    |
| <i>ywaC</i>  | BSU38480              |                               | +                       | +                | 5.3                                | Tested                         | (p)ppGpp synthase          |
| <i>dltA</i>  | BSU38500              | <i>dltABCDE</i>               | +                       |                  | 3.6                                | Tested                         | Teichoic acid synthesis    |
| <i>dltB</i>  | BSU38510              | <i>dltABCDE</i>               | +                       |                  | 6.2                                | Tested                         | Teichoic acid synthesis    |
| <i>dltC</i>  | BSU38520              | <i>dltABCDE</i>               | +                       |                  | 7.7                                |                                | Teichoic acid synthesis    |
| <i>dltD</i>  | BSU38530              | <i>dltABCDE</i>               | +                       |                  | 7.7                                |                                | Teichoic acid synthesis    |
| <i>dltE</i>  | BSU38540              | <i>dltABCDE</i>               | +                       | +                | 7.3                                |                                | Teichoic acid synthesis    |
| <i>yxeF</i>  | BSU39570              |                               |                         |                  | 24.4                               | Tested                         | Unknown                    |

**a** Genes and BSU code organized by increasing BSU number.

**b** A few  $\sigma^M$ -dependent genes belong to same operon<sup>10 26,27</sup>, as indicated.

**c** Known  $\sigma^M$ -dependent genes are labelled “+”<sup>10 26</sup>.

**d** Genes reported to belong to the MOE stimulon are labelled “+”<sup>10</sup>.

**e** Fold increase (Fi) in transcription (RNA-Seq data) of genes in strain *Δ4* (AG157) relative to the wild type (168CA), in mid-exponential cells grown in nutrient broth at 37°C. “-“ indicates down regulation.

**f** Around fifty gene deletion strains were tested by MOE-growth assays (growth in LB was monitored for 16h in the presence of 0, 1.25, 2.5, 5, 10 and 20  $\mu\text{g ml}^{-1}$  of MOE). Essential genes were not tested, except as indicated in the Results.



Extended data Table 2. Strains plasmids and oligos.

Bacterial strains used in this study

| Strains                                                         | Relevant genotype                                                                                                                                                   | References                            |
|-----------------------------------------------------------------|---------------------------------------------------------------------------------------------------------------------------------------------------------------------|---------------------------------------|
| <b><i>E. coli</i></b>                                           |                                                                                                                                                                     |                                       |
| DH5 $\alpha$                                                    | F- $\phi$ 80 <i>lacZ</i> $\Delta$ M15 $\Delta$ ( <i>lacZYAargF</i> )U196 <i>recA1 endA1 hsdR17</i> ( $r_K^-$ , $m_K^+$ ) <i>phoA supE44</i> $\lambda$ - <i>thi1</i> | Lab. stock                            |
| TG1                                                             | K-12 <i>supE thi-1</i> $\Delta$ ( <i>lac-proAB</i> ) $\Delta$ ( <i>mcrB-hsdSM</i> )5, ( $r_K^- m_K^-$ )                                                             | Lab. stock                            |
| <b><i>B. subtilis</i></b>                                       |                                                                                                                                                                     |                                       |
| 168CA                                                           | <i>trpC2</i>                                                                                                                                                        | Lab. stock                            |
| DPVB45                                                          | $\Delta$ <i>pbpG::kan</i>                                                                                                                                           | 11                                    |
| RE101                                                           | 168CA $\Delta$ <i>ponA</i>                                                                                                                                          | This work                             |
| AG157                                                           | 168CA $\Delta$ <i>ponA</i> $\Delta$ <i>pbpD</i> $\Delta$ <i>pbpF</i> $\Delta$ <i>pbpG::kan</i>                                                                      | This work                             |
| AG201                                                           | 168CA $\Delta$ <i>pbpG::erm</i>                                                                                                                                     | This work                             |
| AG221                                                           | 168CA $\Delta$ <i>ponA</i> $\Delta$ <i>pbpD</i> $\Delta$ <i>pbpF</i> $\Delta$ <i>pbpG::erm</i> pLOSS- <i>P<sub>spac</sub>-ponA</i>                                  | This work                             |
| AG494                                                           | 168CA $\Delta$ <i>sigM::kan</i>                                                                                                                                     | 28                                    |
| AG831                                                           | AG221 $\Delta$ <i>sigM::kan</i>                                                                                                                                     | This work                             |
| YK1342                                                          | 168CA $\Omega$ <i>neo3427</i> $\Delta$ <i>mreD</i>                                                                                                                  | 16                                    |
| YK1343                                                          | 168CA $\Delta$ <i>rodA::kan</i>                                                                                                                                     | 16                                    |
| YK1347                                                          | 168CA $\Omega$ <i>neo3427</i> $\Delta$ <i>mreC kan</i>                                                                                                              | 16                                    |
| YK1334                                                          | 168CA $\Delta$ <i>ponA::spc</i>                                                                                                                                     | 24                                    |
| YK2235                                                          | AG221 $\Omega$ <i>rodA::kan-P<sub>spac</sub>-rodA</i>                                                                                                               | This work                             |
| YK2239                                                          | 168CA $\Delta$ <i>ponA</i> $\Delta$ <i>pbpD</i> $\Delta$ <i>pbpF</i> $\Delta$ <i>pbpG::erm</i>                                                                      | This work                             |
| YK2242                                                          | YK2239 $\Omega$ <i>rodA::kan-P<sub>spac</sub>-rodA</i>                                                                                                              | This work                             |
| YK2245                                                          | 168CA $\Omega$ <i>rodA::kan-P<sub>spac</sub>-rodA</i>                                                                                                               | This work                             |
| YK2246                                                          | 168CA $\Delta$ <i>ponA::spc</i> $\Omega$ <i>rodA::kan-P<sub>spac</sub>-rodA</i>                                                                                     | This work                             |
| YK2249                                                          | 168CA <i>amyE::P<sub>xyI</sub>-rodA cat</i>                                                                                                                         | This work                             |
| YK2250                                                          | 168CA <i>amyE::P<sub>xyI</sub>-ftsW cat</i>                                                                                                                         | This work                             |
| YK2251                                                          | 168CA $\Delta$ <i>ponA::spc</i> <i>amyE::P<sub>xyI</sub>-rodA cat</i>                                                                                               | This work                             |
| YK2256                                                          | AG221 <i>amyE::P<sub>xyI</sub>-rodA cat</i>                                                                                                                         | This work                             |
| YK2257                                                          | AG221 <i>amyE::P<sub>xyI</sub>-ftsW cat</i>                                                                                                                         | This work                             |
| YK2259                                                          | AG221 <i>amyE::P<sub>xyI</sub>-rodA cat</i> $\Delta$ <i>sigM::kan</i>                                                                                               | This work                             |
| YK2268                                                          | 168CA <i>amyE::P<sub>xyI</sub>-rodA cat</i> $\Delta$ <i>sigM::kan</i>                                                                                               | This work                             |
| YK2270                                                          | 168CA <i>amyE::P<sub>xyI</sub>-mreBCD spc</i> $\Delta$ <i>mreC::kan</i>                                                                                             | 15                                    |
| YK2271                                                          | 168CA <i>amyE::P<sub>xyI</sub>-mreBCD spc</i> $\Delta$ <i>mreD::kan</i>                                                                                             | 15                                    |
| YK2272                                                          | 168CA <i>amyE::P<sub>xyI</sub>-mreBCD spc</i> $\Delta$ <i>mreC::kan</i> $\Delta$ <i>ponA</i>                                                                        | This work                             |
| YK2273                                                          | 168CA <i>amyE::P<sub>xyI</sub>-mreBCD spc</i> $\Delta$ <i>mreD::kan</i> $\Delta$ <i>ponA</i>                                                                        | This work                             |
| YK2274                                                          | 168CA <i>amyE::P<sub>xyI</sub>-mreBCD</i>                                                                                                                           | 15                                    |
| YK2275                                                          | 168CA <i>amyE::P<sub>xyI</sub>-mreBCD spc</i> $\Delta$ <i>ponA</i>                                                                                                  | This work                             |
| YK2276                                                          | 168CA $\Delta$ <i>sigM::kan</i> <i>amyE::P<sub>xyI</sub>-mreBCD spc</i>                                                                                             | This work                             |
| <b><i>B. subtilis</i> strains used for MOE sensitivity test</b> |                                                                                                                                                                     |                                       |
| AG832                                                           | 168CA $\Delta$ <i>ylxW::erm</i>                                                                                                                                     | Koo BM <i>et al.</i> , in preparation |
| AG833                                                           | 168CA $\Delta$ <i>ylxX::erm</i>                                                                                                                                     | Koo BM <i>et al.</i> , in preparation |
| AG834                                                           | 168CA $\Delta$ <i>sbp::erm</i>                                                                                                                                      | Koo BM <i>et al.</i> , in preparation |
| AG835                                                           | 168CA $\Delta$ <i>yqjL::erm</i>                                                                                                                                     | Koo BM <i>et al.</i> , in preparation |
| AG836                                                           | 168CA $\Delta$ <i>ytpA::erm</i>                                                                                                                                     | Koo BM <i>et al.</i> , in preparation |
| AG837                                                           | 168CA $\Delta$ <i>yceC::erm</i>                                                                                                                                     | Koo BM <i>et al.</i> , in preparation |
| AG838                                                           | 168CA $\Delta$ <i>yceD::erm</i>                                                                                                                                     | Koo BM <i>et al.</i> , in preparation |
| AG839                                                           | 168CA $\Delta$ <i>yceE::erm</i>                                                                                                                                     | Koo BM <i>et al.</i> , in preparation |
| AG840                                                           | 168CA $\Delta$ <i>yypbG::erm</i>                                                                                                                                    | Koo BM <i>et al.</i> , in preparation |
| AG851                                                           | 168CA $\Delta$ <i>yypuD::erm</i>                                                                                                                                    | Koo BM <i>et al.</i> , in preparation |
| AG852                                                           | 168CA $\Delta$ <i>yqiG::erm</i>                                                                                                                                     | Koo BM <i>et al.</i> , in preparation |
| AG853                                                           | 168CA $\Delta$ <i>yxeF::erm</i>                                                                                                                                     | Koo BM <i>et al.</i> , in preparation |
| AG856                                                           | 168CA $\Delta$ <i>yceH::erm</i>                                                                                                                                     | Koo BM <i>et al.</i> , in preparation |
| AG857                                                           | 168CA $\Delta$ <i>yceF::erm</i>                                                                                                                                     | Koo BM <i>et al.</i> , in preparation |
| AG858                                                           | 168CA $\Delta$ <i>yfiC::erm</i>                                                                                                                                     | Koo BM <i>et al.</i> , in preparation |
| AG859                                                           | 168CA $\Delta$ <i>ylzH::erm</i>                                                                                                                                     | Koo BM <i>et al.</i> , in preparation |

|        |                           |                                       |
|--------|---------------------------|---------------------------------------|
| AG860  | 168CA $\Delta$ yrzF::erm  | Koo BM <i>et al.</i> , in preparation |
| AG861  | 168CA $\Delta$ ywbG::erm  | Koo BM <i>et al.</i> , in preparation |
| AG862  | 168CA $\Delta$ ywzG::erm  | Koo BM <i>et al.</i> , in preparation |
| AG863  | 168CA $\Delta$ ydfM::erm  | Koo BM <i>et al.</i> , in preparation |
| AG864  | 168CA $\Delta$ yrhH::erm  | Koo BM <i>et al.</i> , in preparation |
| AG865  | 168CA $\Delta$ yfiN::erm  | Koo BM <i>et al.</i> , in preparation |
| AG881  | 168CA $\Delta$ ycgQ::erm  | Koo BM <i>et al.</i> , in preparation |
| AG882  | 168CA $\Delta$ ycgR::erm  | Koo BM <i>et al.</i> , in preparation |
| AG883  | 168CA $\Delta$ yjbC::erm  | Koo BM <i>et al.</i> , in preparation |
| AG884  | 168CA $\Delta$ ylaA::erm  | Koo BM <i>et al.</i> , in preparation |
| AG885  | 168CA $\Delta$ amj::erm   | Koo BM <i>et al.</i> , in preparation |
| AG886  | 168CA $\Delta$ yrhL::erm  | Koo BM <i>et al.</i> , in preparation |
| AG887  | 168CA $\Delta$ ytrB::erm  | Koo BM <i>et al.</i> , in preparation |
| AG888  | 168CA $\Delta$ ywbO::erm  | Koo BM <i>et al.</i> , in preparation |
| AG1085 | 168CA $\Delta$ yceG::erm  | Koo BM <i>et al.</i> , in preparation |
| AG1086 | 168CA $\Delta$ ywaC::erm  | Koo BM <i>et al.</i> , in preparation |
| AG1087 | 168CA $\Delta$ yacl::erm  | Koo BM <i>et al.</i> , in preparation |
| AG1088 | 168CA $\Delta$ yebC::erm  | Koo BM <i>et al.</i> , in preparation |
| AG1089 | 168CA $\Delta$ abh::erm   | Koo BM <i>et al.</i> , in preparation |
| AG1090 | 168CA $\Delta$ yacC::erm  | Koo BM <i>et al.</i> , in preparation |
| AG1091 | 168CA $\Delta$ ypuA::erm  | Koo BM <i>et al.</i> , in preparation |
| AG1092 | 168CA $\Delta$ yngC::erm  | Koo BM <i>et al.</i> , in preparation |
| AG1093 | 168CA $\Delta$ ydcA::erm  | Koo BM <i>et al.</i> , in preparation |
| AG1094 | 168CA $\Delta$ bcrC::erm  | Koo BM <i>et al.</i> , in preparation |
| AG1095 | 168CA $\Delta$ yrhJ::erm  | Koo BM <i>et al.</i> , in preparation |
| AG1096 | 168CA $\Delta$ fatR::erm  | Koo BM <i>et al.</i> , in preparation |
| AG1097 | 168CA $\Delta$ ywnJ::erm  | Koo BM <i>et al.</i> , in preparation |
| AG1098 | 168CA $\Delta$ yvrD::erm  | Koo BM <i>et al.</i> , in preparation |
| AG1100 | 168CA $\Delta$ yhbI::erm  | Koo BM <i>et al.</i> , in preparation |
| AG1161 | 168CA $\Delta$ minCD::kan | 29                                    |
| AG1174 | 168CA $\Delta$ minD::erm  | 30                                    |
| AG1245 | 168CA $\Delta$ ltAB::cat  | 31                                    |
| RE203  | 168CA $\Delta$ tagT::spc  | 16                                    |
| AG612  | 168CA $\Delta$ ltaSA::erm | 32                                    |

cat, chloramphenicol; tet, tetracyclin; erm, erythromycin; spc, spectinomycin; kan, kanamycin; bla,  $\beta$ -lactamase; represent resistant genes, respectively.

### Plasmids used in this study

| Plasmids                                      | Relevant features                                                                                                                                                   | References |
|-----------------------------------------------|---------------------------------------------------------------------------------------------------------------------------------------------------------------------|------------|
| pMUTIN4                                       | used as matrix to amplify <i>erm</i>                                                                                                                                | 33         |
| pG <sup>+</sup> host9                         | thermosensitive replication, <i>erm</i>                                                                                                                             | 23         |
| pG <sup>+</sup> host10                        | pG <sup>+</sup> host9, <i>bla</i>                                                                                                                                   | This study |
| pG <sup>+</sup> host9:: $\Delta$ ponA         | carry flanking DNA regions of <i>ponA</i>                                                                                                                           | This study |
| pG <sup>+</sup> host10:: $\Delta$ pbpD        | carry flanking DNA regions of <i>pbpD</i>                                                                                                                           | This study |
| pG <sup>+</sup> host10:: $\Delta$ pbpF        | carry flanking DNA regions of <i>pbpF</i>                                                                                                                           | This study |
| pLOSS*                                        | <i>bla</i> <i>spc</i> <i>P</i> <sub>spac</sub> - <i>mcs</i> <i>P</i> <sub>divIVA</sub> - <i>lacZ</i> <i>lacI</i> <i>rep</i> <sub>PLS20</sub> (GA $\rightarrow$ CC)  | 24         |
| pLOSS- <i>P</i> <sub>spac</sub> - <i>ponA</i> | <i>bla</i> <i>spc</i> <i>P</i> <sub>spac</sub> - <i>ponA</i> <i>P</i> <sub>divIVA</sub> - <i>lacZ</i> <i>lacI</i> <i>rep</i> <sub>PLS20</sub> (GA $\rightarrow$ CC) | This study |
| pSG441                                        | <i>bla</i> <i>aph</i> -A3 <i>lacI</i> <i>P</i> <sub>spac</sub>                                                                                                      | 34         |
| pRD159                                        | <i>bla</i> <i>aph</i> -A3 <i>lacI</i> <i>P</i> <sub>spac</sub> - <i>rodA</i> '                                                                                      | This work  |
| pJPR1                                         | <i>bla</i> <i>amyE3</i> ' <i>cat</i> <i>P</i> <sub>xyI</sub> <i>amyE5</i> '                                                                                         | Lab stock  |
| pRD163                                        | <i>bla</i> <i>amyE3</i> ' <i>cat</i> <i>P</i> <sub>xyI</sub> - <i>rodA</i> <i>amyE5</i> '                                                                           | This work  |
| pRD164                                        | <i>bla</i> <i>amyE3</i> ' <i>cat</i> <i>P</i> <sub>xyI</sub> - <i>ftsW</i> <i>amyE5</i> '                                                                           | This work  |

*erm*, erythromycin resistance, *bla*, ampicillin resistance; *spc*, spectinomycin resistance; *mcs*, multiple cloning site; *lacZ*,  $\beta$ -galactosidase; *lacI*, lactose repressor.

### Primers used in this study

| Primers | Sequence                         |                                                 |
|---------|----------------------------------|-------------------------------------------------|
| RE05    | GACATCGATGACGAAAGGGCCTCGTGATACGC | To insert <i>bla</i> into pG <sup>+</sup> host9 |
| RE06    | CTTACTCGAGCCACCGCTGGTAGCGGTGG    | To insert <i>bla</i> into pG <sup>+</sup> host9 |

|           |                                         |                                                       |
|-----------|-----------------------------------------|-------------------------------------------------------|
| RE01      | GACGCGGCCGCCGAAGATGACTTAAACGAAACG       | <i>ponA</i> pGhost9 left flank For primer (NotI)      |
| RE02      | CTTAGAATTCCGTTAATCAACCTTTTCGCACC        | <i>ponA</i> pGhost9 left flank Rev primer (EcoRI)     |
| RE03      | GACGAATTCCCGTCACCTTTGGGGTGATGGC         | <i>ponA</i> pGhost9 right flank For primer (EcoRI)    |
| RE04      | CTTAGGTACCCGCAAGCAAAAGAAGTGTGGC         | <i>ponA</i> pGhost9 right flank Rev primer (KpnI)     |
| RE07      | GACGCGGCCGCGGCATTTTCAGCAACGGG           | <i>pbpD</i> pGhost9 left flank For primer (NotI)      |
| RE08      | CTTAGAATTCATTCTAGCCATATCGTA             | <i>pbpD</i> pGhost9 left flank Rev primer (EcoRI)     |
| RE09      | GACGAATTCTAAAGGATCGGAGGGGATATGG         | <i>pbpD</i> pGhost9 right flank For primer (EcoRI)    |
| RE10      | CTTAAAGCTTCTAGATTCTCAGGTTTCCGCCG        | <i>pbpD</i> pGhost10 right flank Rev primer (HindIII) |
| RE11      | GACGCGGCCGCGCCAGTCTTGAAAGGCGCTTTCCG     | <i>pbpF</i> pGhost9 left flank For primer (NotI)      |
| RE12      | CTTAGAATTCCTTCTAAAGGTAGTATGGG           | <i>pbpF</i> pGhost9 left flank Rev primer (EcoRI)     |
| RE13      | GACGAATTCGCGATTTTTTGAACCTTGAGC          | <i>pbpF</i> pGhost9 right flank For primer (EcoRI)    |
| RE14      | CTTAAAGCTTCTCAAGCACGTACGGCACGTCC        | <i>pbpF</i> pGhost10 right flank Rev primer (HindIII) |
| AG21B     | GGTAACGCCAGGGTTTTTC                     | To check insert in pGhost9 by sequencing              |
| AG22      | GTGCCACCTGACGTCTAA                      | To check insert in pGhost9/10 by sequencing           |
| AG23      | CACGTACTAAAGGGAATG                      | To check insert in pGhost10 by sequencing             |
| AG11      | GACGCGGCCGCGAAAGGTTGAGATGTTATGTC        | To amplify <i>ponA</i> locus                          |
| AG12      | GGCACTAGTTAAAACGGGAGGTTTTTATTGTG        | To amplify <i>ponA</i> locus                          |
| AG18      | GTTGACTTTATCTACAAGGT                    | To check insert cloned in pLOSS*                      |
| AG19      | GGTACCAGTAGTTCACCAC                     | To check insert cloned in pLOSS*                      |
| AG124     | CCATCATCTGGTGCGAAAGG                    | To check <i>B. subtilis</i> $\Delta$ <i>ponA</i>      |
| AG125     | CCGCAAAGCCGATTAATTGG                    | To check <i>B. subtilis</i> $\Delta$ <i>ponA</i>      |
| AG126     | TCTATTGGCGAGTGCTTC                      | To check <i>B. subtilis</i> $\Delta$ <i>pbpF</i>      |
| AG127     | AGCATCGACTCCGTATTG                      | To check <i>B. subtilis</i> $\Delta$ <i>pbpF</i>      |
| AG128     | TTATTCGGAATGGCGATGGG                    | To check <i>B. subtilis</i> $\Delta$ <i>pbpD</i>      |
| AG129     | CCTTAATGGCTGCAGTTGAC                    | To check <i>B. subtilis</i> $\Delta$ <i>pbpD</i>      |
| AG203     | GTACGTCTAGAGTGTTCTGCTGACTTGC            | To amplify erythromycin cassette                      |
| AG204     | GGGGATCCTTGGAAAGCTGTCTAGTAG             | To amplify erythromycin cassette                      |
| AG200-for | GACAGGCCATGAAATTGGAG                    | To amplify upstream <i>pbpG</i>                       |
| AG114-rev | GCTCTAGACATTGCATCCACAACGGGTTCC          | To amplify upstream <i>pbpG</i>                       |
| AG201     | CGGGATCCGGACAGAACCCGCAAACGTG            | To amplify downstream <i>pbpG</i>                     |
| AG202     | TGGGAGCTGCACCATAAAGG                    | To amplify downstream <i>pbpG</i>                     |
| AG130     | AGAACGTGCTCCGGATTTGG                    | To check <i>B. subtilis</i> $\Delta$ <i>pbpG</i>      |
| AG131     | CGGCGACTGGGAGATGAAAG                    | To check <i>B. subtilis</i> $\Delta$ <i>pbpG</i>      |
| AG338     | TTCCATTGTGCCACTCCTTC                    | To check <i>B. subtilis</i> $\Delta$ <i>sigM</i>      |
| AG339     | GTTTCGCTGTCAATCAGTTCC                   | To check <i>B. subtilis</i> $\Delta$ <i>sigM</i>      |
| AG328     | AAGTCTAGATAATGGAAGTTAGAAGCAGGGAAGAGGATG | To amplify <i>ftsW</i>                                |
| AG329     | ATTAGCGGCCGCGGAATATCCTTCCCCTGTACAC      | To amplify <i>ftsW</i>                                |
| AG330     | ATGTCTAGATGAAAATGTAAGGCGGGATAGAATGAG    | To amplify <i>rodA</i>                                |
| AG331     | GATGCGGCCGCGACCTCTGTAAAGGCTGTCTGC       | To amplify <i>rodA</i>                                |
