# Supplementary material
Source: PubMed Central journal article supplement (PMC5568705)
Supplement: NIHMS73795-supplement-Supplementary_data_1.pdf [file NIHMS73795-supplement-Supplementary_data_1.pdf]

Supplementary Figure 1. RodA alignments.

|                                     |                              |   |        |                                                  |       |                            |    |
|-------------------------------------|------------------------------|---|--------|--------------------------------------------------|-------|----------------------------|----|
| <input checked="" type="checkbox"/> | Query_RodA Bs                | 1 | [ 1 ]  | -----SRYKKQQSPFYQGDLIFIFGVFFIISVSVSIYAAGQFGQY    | [ 1 ] | NTDWIQQIVFYLLGAVAITVLLYFDL | 67 |
| <input checked="" type="checkbox"/> | <a href="#">KRL33981</a>     | 1 |        | -----MMMLGLIGLASIYVAAVHDSSSV--NV                 |       | TKQVISQVMWFVIGTAIAVIVMQFDS | 51 |
| <input checked="" type="checkbox"/> | <a href="#">WP_013103083</a> | 1 | [ 5 ]  | SRqMSNRTSASELDWGIILALLLFMIIGLSSVYQAALHSQYGTVQMA  |       | VRTTIVQGLFWVIGAIILFLLRFDA  | 78 |
| <input checked="" type="checkbox"/> | <a href="#">WP_003866920</a> | 1 | [ 8 ]  | -----NFDWGLLIVVLLICVYSVIVVTSASH--TLQTGSYR        |       | --KVIIQIAAILVGLISIALICLFDY | 66 |
| <input checked="" type="checkbox"/> | <a href="#">WP_054095977</a> | 1 | [ 1 ]  | RTvQKKRFLILNIDPFIIMVVL-----VLATISIVAISSATYTDDP   |       | -TYVNKQIVWYVVGFLCMSIFLLLDY | 67 |
| <input checked="" type="checkbox"/> | <a href="#">WP_015798384</a> | 1 | [ 11 ] | TTwARLRS----YDALLWLLAAAVGVFGVVMVYSATRNQLELAGLSP  |       | HYYLDRQAIFWVLGLIVMSVVAALDL | 80 |
| <input checked="" type="checkbox"/> | <a href="#">WP_012897546</a> | 1 | [ 2 ]  | NKkANRFTFDSRIDYGLILPAFMLILIGLYALYVAVSHDHPQTATM   |       | ---VVQGTWVIVGLFVALIVMHMDS  | 72 |
| <input checked="" type="checkbox"/> | <a href="#">WP_012283736</a> | 1 |        | ---MRWKLAR-NLDLTLVAVVLLLLTFSIVIMRSASS---NVGADP   |       | LAFARKQTIWVFVGITFVIISMFFHY | 65 |
| <input checked="" type="checkbox"/> | <a href="#">WP_010964563</a> | 1 | [ 4 ]  | -----KLKIDKRTLKQIDFLIFLIPIVIAIFSSLNIYSAVHRNSA    | [ 1 ] | ASTWKLQLIWCLMGIIAIYIIKMDY  | 71 |
| <input checked="" type="checkbox"/> | <a href="#">WP_052670071</a> | 1 | [ 7 ]  | SRwQEAYAPIKHLDPVLVLSALALTGIGLVAIYSAKLQALTDQGLSP  |       | LLYISRQVLAMVVGILGMVAAVIDY  | 80 |
| <input checked="" type="checkbox"/> | <a href="#">WP_021295852</a> | 1 |        | --mEMLRRNIRDLDFTVFGVLLLLAAAYGTIAIDAATHSHANPYIPSH |       | --IMVNQIVYEIVGVLALLATTVFDY | 69 |
| <input checked="" type="checkbox"/> | <a href="#">WP_004094495</a> | 1 | [ 8 ]  | -----NLDFVLIAVTLLIIAISLIFIGSATHINSSIEDRYW        |       | --YVQRQGAFALINIIVFWLLHYDY  | 68 |
| <input checked="" type="checkbox"/> | <a href="#">AHC50233</a>     | 1 | [ 13 ] | -----AFDWPLLAILLMFAALGLTMHSAVG-----GTDW          |       | --RFAEQSRNFIIAFFAMWTMALIPP | 67 |
| <input checked="" type="checkbox"/> | <a href="#">CAA74601</a>     | 1 |        | -----MARRLDWPILLAVALSLMGSLLVYSATRNRTELNQGDO      |       | YYFLTRHLLNTGIGLALMVATVWLGH | 65 |
| <input checked="" type="checkbox"/> | <a href="#">WP_011524430</a> | 1 |        | ---MAKRVSV---DKWLFGSTLLLVFIGLIMVFSASAVMAGEKFGSP  |       | YAFFLRQLVWAVAGVGAMVVCMNIDY | 67 |
| <input checked="" type="checkbox"/> | <a href="#">WP_012256594</a> | 1 |        | ----METRRWRDLDWGILVSVAVLLIIGSLALHSATL--NAVAGNGL  | [ 2 ] | RPVFGRQIVYIVVGLIAMVAMMSFDY | 69 |
| <input checked="" type="checkbox"/> | <a href="#">ABF88160</a>     | 1 | [ 6 ]  | -----WGLIFSVLAVCGLGIWNLASASRPPHSPV----           |       | ---WGSQMGYLGISMVAVLVCLVDY  | 58 |
| <input checked="" type="checkbox"/> | <a href="#">WP_023036458</a> | 1 | [ 2 ]  | N-----NIYLKKISKFSVFFVFNIL---LLFIISLSTIYSATITKSE  |       | -PFFIKEIIFWFIISVFVFGVSLVDY | 66 |
| <input checked="" type="checkbox"/> | <a href="#">WP_003815198</a> | 1 | [ 13 ] | -----AFDWPLLLILILFTLLGLTMHSAVG-----STDW          |       | --RFAEQSRNFLIAFAAMWAMALVPP | 67 |
| <input checked="" type="checkbox"/> | <a href="#">WP_012893695</a> | 1 | [ 14 ] | RRaVTASSAVRRMDGVLLVAVAAALAVIGTMLVWSSTRTWAPGST--- |       | -GLVKKHILNLCIGTVLTGMAAMVDH | 83 |
| <input checked="" type="checkbox"/> | <a href="#">WP_010963045</a> | 1 | [ 2 ]  | RL-----KKIHWLLVINVIALFCVGIVVQYSSAGGKWVP-----     |       | --FAIHQLVIFSFLLAIAMSFIEL   | 60 |
| <input checked="" type="checkbox"/> | <a href="#">WP_015723471</a> | 1 | [ 9 ]  | -----HHFDWVMLLMLLLVGGMALTNLYSSTYIADNGA-SS-       |       | --VFYKQLLFSSVGLVLILVVLQTQY | 68 |

|                                     |                              |   |           |                                                 |                                             |                            |    |
|-------------------------------------|------------------------------|---|-----------|-------------------------------------------------|---------------------------------------------|----------------------------|----|
| <input checked="" type="checkbox"/> | <a href="#">AIE75879</a>     | 1 | [ 24 ] EA | r-----LMRTLFFAWMAMGVVVLFSASYAESLDTSGMG          | LSIILKQIAYLWVGLNIFNFLVRLPL                  | 85                         |    |
| <input checked="" type="checkbox"/> | <a href="#">WP_015646126</a> | 1 |           | -----MLFGLATLRSATYGEN                           | EQLFTRQIVWDIAGFSLMFLVLFIKD                  | 42                         |    |
| <input checked="" type="checkbox"/> | <a href="#">WP_006193613</a> | 1 | [ 7 ]     | -----RMDFTLIGATAAIVVMSLIVIGSATHINTAGGDHYW       | --FVQKQGAFFVVLNVLFAIFLMNFDY                 | 67                         |    |
| <input checked="" type="checkbox"/> | <a href="#">WP_012545997</a> | 1 | [ 5 ]     | -----IDKTLIIAVTILVIIGLIAVYSSTSVLASVKAKYA        | [ 4 ] MIYLQKQLFTLIIGFFFIVVFIFLPV            | 70                         |    |
| <input checked="" type="checkbox"/> | <a href="#">WP_010943695</a> | 1 | [ 12 ]    | -----YDLVILLMAVALTCFGVVMVYSASSVMATKKFHDG        | FYFLKRQGVYALLGFGVMAVAMRIDY                  | 73                         |    |
| <input checked="" type="checkbox"/> | <a href="#">WP_012963917</a> | 1 | [ 1 ]     | RL-----KGIDPVLMMALVLVQLIGFLGVFSATYKDGIS         | -----PLFLKQFLYTVLGWIMLIVITFTNF              | 60                         |    |
| <input checked="" type="checkbox"/> | <a href="#">WP_012874018</a> | 1 | [ 2 ]     | SREITTPWWRKFDWVLLLCTLALSSFGLVMIYSATS            | -----DPG [ 4 ] NPLVIRQFIYLIVGLLFMSIMATVDY   | 72                         |    |
| <input checked="" type="checkbox"/> | <a href="#">WP_010931982</a> | 1 | [ 6 ]     | -----KFDLLWLLVPLSGLIVMGLMAVYSATNGSTESV          | --P--LFFYKQLSWAVTGAIAASIIYFMDY              | 64                         |    |
| <input checked="" type="checkbox"/> | <a href="#">WP_003976192</a> | 1 | [ 18 ]    | TRlFARDSMARRLDWPILLAVALSLMGSLLVYSATRNRTELNQGDQ  | YYFLTRHLLNTGIGLALMVATVWLGH                  | 91                         |    |
| <input checked="" type="checkbox"/> | <a href="#">WP_027868355</a> | 1 | [ 31 ]    | GSrEKDTSLLIMYDRTLWLTFGLAAIGFIMVTSASMPIGQRLTNDP  | FFFfAKRDGVYLILAFILAIITLRLPM                 | 104                        |    |
| <input checked="" type="checkbox"/> | <a href="#">WP_012546334</a> | 1 |           | -MlKIDRRLISSFDWVTLGVVLFICIIGILTIYSATR           | -PPLDEGEQP [ 1 ] --FYVKQLIWLIIAIIALCVFITFDY | 70                         |    |
| <input checked="" type="checkbox"/> | <a href="#">WP_011242757</a> | 1 | [ 12 ]    | QKfAFLDAWKGMDRWLLFIPIALTLGGLLI                  | -----RSTQANQN                               | FADWWQHWITGAVGVGLALAIARWRY | 77 |
| <input checked="" type="checkbox"/> | <a href="#">WP_013708713</a> | 1 | [ 20 ]    | RISSKNSWRRQVSPSVLVSSLALISYGALVIWTASL            | -----SIP                                    | EASFPRQLLGIGIGLIAMVGWVRFDF | 86 |
| <input checked="" type="checkbox"/> | <a href="#">WP_014546566</a> | 1 |           | MSsGRFVDKPLKIDWVFIGVTLTLMTCGVLLVYSATVNEEIAFYDTH | ---WFRQIIYFLMGIAIAVGLVVFVKI                 | 70                         |    |
| <input checked="" type="checkbox"/> | <a href="#">WP_048435637</a> | 1 | [ 4 ]     | AErSHLGDWWTVDRALLAGLVLMTAGLVFLMAGGPPVAERLGLPT   | FHFLNRQVMYLLPTIALILAVSFLSL                  | 77                         |    |
| <input checked="" type="checkbox"/> | <a href="#">WP_013127264</a> | 1 | [ 62 ]    | VNvGTALRRPLASYHLVLGLTAVLTVLGLVMVLSASSVEDISATGSP | YSKFTSQLIYVGLGVVAFFGALYLRP                  | 135                        |    |
| <input checked="" type="checkbox"/> | <a href="#">WP_011522270</a> | 1 | [ 2 ]     | R-----YVSFRDFDFWLLLFLVLIICTLGVIEIYSATF          | -----GTKFA                                  | -GAHVKQIYWVIGGVIVMFLLSLVNY | 64 |
| <input checked="" type="checkbox"/> | <a href="#">WP_012683246</a> | 1 |           | -MpVTSVLRQSIDFPLLLIALLLTAFGIAMVFSAGQIDAPSTITAG  | --AWKRQLSWFGLCLAATWVVTRGSV                  | 70                         |    |
| <input checked="" type="checkbox"/> | <a href="#">WP_010942720</a> | 1 |           | ---MIDRRLITNFDWMLLGLVLLICAVGVVNIYSASS           | --SYVLSGTP                                  | YY--LKQMSWVLVGLAIMLLVCSIDY | 66 |
| <input checked="" type="checkbox"/> | <a href="#">WP_011112575</a> | 1 | [ 4 ]     | DIkKIWYYFTRYIDNFFLAGIFLLMLTGLIVLYSATG           | -----G [ 1 ] LTRVISQLINMIVAFVVMWTVANIPL     | 69                         |    |
| <input checked="" type="checkbox"/> | <a href="#">WP_003114090</a> | 1 |           | MRrRASLLQRLHIDGILLLLLLLILGATGLFVLYSASG          | -----K [ 1 ] WDMLMKQATSFGLGLGMMVVIAQIEP     | 65                         |    |
| <input checked="" type="checkbox"/> | <a href="#">WP_013066543</a> | 1 | [ 18 ]    | -----LFLNWPLIFLLTAVAGTGFLMLYSVAGGNLETW          | ----                                        | ---AEPQMKRFGVGLVAMIAGLTPi  | 74 |
| <input checked="" type="checkbox"/> | <a href="#">WP_011744311</a> | 1 | [ 6 ]     | -----NVD-FWLLVPMIGLIVFGLMAIFSATHGAGETT          | ----                                        | --LFYRQFAWGVIGAVVMLFVYFNDY | 62 |

|                                     |                              |   |        |                                                  |                            |     |
|-------------------------------------|------------------------------|---|--------|--------------------------------------------------|----------------------------|-----|
| <input checked="" type="checkbox"/> | <a href="#">WP_002853654</a> | 1 | [ 2 ]  | -----RLDRRILTHFDYMQPILFLPIILISFFLIFEAN           | PFLAEKQFVYACVGLFAMVFFFPPI  | 61  |
| <input checked="" type="checkbox"/> | <a href="#">WP_009963846</a> | 1 |        | --mTPLFRKFLGLNWILALNMIALIVGWVWAIYNASSFREGMNLSTV  | ---WRSQVQWAVLGLGVFGAAALVDY | 68  |
| <input checked="" type="checkbox"/> | <a href="#">WP_012851903</a> | 1 | [ 21 ] | HRlV----ALRRLDWKLITAVVALSVLSALLVRSATFAELAEQGRDP  | NGFVKRHLLNLALGLILGGVVAMLDY | 90  |
| <input checked="" type="checkbox"/> | <a href="#">WP_010881835</a> | 1 | [ 10 ] | VHqERYSF-----VFILLVALMVGVGFTLYSGSVHYAQRFFRYP     | GYFLVRQGVSIGIGLVCLLFFTFVRL | 76  |
| <input checked="" type="checkbox"/> | <a href="#">WP_003867927</a> | 1 |        | ---MKKKYPV---DYGILLTVLILVLSIGVIMVFSASSASAEYMYNDP | YYFLKRQLLWVILGFFAMVFMNFYD  | 67  |
| <input checked="" type="checkbox"/> | <a href="#">WP_012869947</a> | 1 | [ 2 ]  | LKsPSWNEIRSTLDRPLGLITGALFSLGMVALLSAST---GVYKANY  | -SFPiRQALWGMVGFAGYIwVIKVGy | 71  |
| <input checked="" type="checkbox"/> | <a href="#">WP_012639260</a> | 1 | [ 1 ]  | ----RTLVRALHLDMLVFTGLLLLAGVGLVALYSATG-ESMDMLN--  | ----RQLVRLAVAFtALLVMAQIPa  | 62  |
| <input checked="" type="checkbox"/> | <a href="#">WP_013007878</a> | 1 | [ 9 ]  | -----KYFDYILTlIVLTIATIGIFAIYSASFdLNSGKFSS-       | --FYlKQMIWLFAGILTYLLFTIINy | 69  |
| <input checked="" type="checkbox"/> | <a href="#">WP_010919421</a> | 1 | [ 18 ] | KF-----MEIDWTFCLFLCLIAGAGALMLFSIAGASWEP-----     | --WAAKHLIRFGLYFIMMVILAMCDL | 76  |
| <input checked="" type="checkbox"/> | <a href="#">WP_012415416</a> | 1 | [ 16 ] | SEqKNKKFTFLVPDRSLLFITAAALMLFGLIFTYSSSAFES-----   | GNLfKRQVIYDIVGLGIAAFLSQFYl | 82  |
| <input checked="" type="checkbox"/> | <a href="#">WP_011564505</a> | 1 | [ 9 ]  | PAsFSNLDRWRSADPVLlLVTLlLSAYGIFAVYVAGT-----SDR    | EAYAVNQSIGFAVGLAGAIPLALIDy | 75  |
| <input checked="" type="checkbox"/> | <a href="#">WP_012411137</a> | 1 | [ 11 ] | SSvSN---WALEARLLRWLTLIWLfVGLIMLFSASYPVADARQGDG   | LYYfKRQLLWVLVSLIGFNIIVNLPL | 80  |
| <input checked="" type="checkbox"/> | <a href="#">WP_000131719</a> | 1 | [ 3 ]  | NPnKKTfWDKvHLDPTMLLlLLALLVYSALVIWSASG-QDIGMME--  | ----RKIGQIAMGLVIMVMAQIPP   | 68  |
| <input checked="" type="checkbox"/> | <a href="#">WP_041571869</a> | 1 | [ 2 ]  | -----DRPLFFLTTLAITIGVIFSYSLsAYATLFYGYNE          | FHFFIRQLIAGIIGIYLMWQVSRFDp | 62  |
| <input checked="" type="checkbox"/> | <a href="#">WP_003033307</a> | 1 | [ 12 ] | NSkKERVRAKLEIDISIVfIMLGLLTFGWVMVTSASMIVALDDYNNP  | YFYsIRQGFfAIIAIFLFLlLVPT   | 85  |
| <input checked="" type="checkbox"/> | <a href="#">WP_011014922</a> | 1 | [ 29 ] | GAwNDLLARPLTDYIMILCIVVILSCLGVVMVYSSSMTWslREGGSV  | WGTAVRQGIIVLGFfAMWVALMTRP  | 102 |
| <input checked="" type="checkbox"/> | <a href="#">WP_012583594</a> | 1 | [ 1 ]  | KR-----REIK--LILVVILLTFIGFLFIYDTTATRLIAKELSP     | YVFLQRQVIAFLIGLVfFAFFATTYy | 64  |

\* \*

|                                     |                              |    |              |                                                                          |     |
|-------------------------------------|------------------------------|----|--------------|--------------------------------------------------------------------------|-----|
| <input checked="" type="checkbox"/> | Query_RodA Bs                | 68 | EQL--EK      | LsLYIFiIGILSLIILKIS[ 3 ]IAPVIKGA---KSWFRI-GR--ITI-QPSEFMKVGLIMMLASVIGKAN | 135 |
| <input checked="" type="checkbox"/> | <a href="#">KRL33981</a>     | 52 | EQL--WR      | VAPIAYWFGIFLLAAVLVL[ 3 ]SLFASTGA---KSWFAV-GS--LTL-QPSEVMKPAFILMLGRVVTMHN | 119 |
| <input checked="" type="checkbox"/> | <a href="#">WP_013103083</a> | 79 | SQL--WR      | LAPVAYGLGVFLlVAVLIF[ 3 ]PMADATGA---KSWFVL-GP--ISF-QPSEVVKPAFILMLSRVVAEHN | 146 |
| <input checked="" type="checkbox"/> | <a href="#">WP_003866920</a> | 67 | NTL--AK      | FSTFIYILNLfGLVLVLA- IGKESKGA---QSWISL-GP--VNI-QPSEFSKLALVLTLANMFSKME     | 130 |
| <input checked="" type="checkbox"/> | <a href="#">WP_054095977</a> | 68 | KIL--SQ[ 4 ] | YILFGfSVLLNLlVMVPGL -GVEVNGA---QLWFRI-GG--FQF-QPSEMMKLILILILAKVLAEKK     | 135 |

|                                     |                              |    |         |                                                                                                 |     |
|-------------------------------------|------------------------------|----|---------|-------------------------------------------------------------------------------------------------|-----|
| <input checked="" type="checkbox"/> | <a href="#">WP_015798384</a> | 81 | EWL--GR | LGYWIYGA <sup>V</sup> LLGLVAVLS-[1]VGSSALGS---QRWFQL-GP--IQV-QPSEFAPIGVMFGIAAYLSGRD             | 145 |
| <input checked="" type="checkbox"/> | <a href="#">WP_012897546</a> | 73 | RFL--WN | LTPFFYV <sup>L</sup> GLILMFLPIFF[3]ATYASTGA---KNWLAFgGR--NLF-QPSEFMKLSYILFSARIVVTFQ             | 141 |
| <input checked="" type="checkbox"/> | <a href="#">WP_012283736</a> | 66 | QTL--SR | YSWYLYGLNLLILIAVLIP[1]LGVNVNGA---VRWINV-GG--FQF-QPSEFAKLLMIITFADFLSKR-                          | 130 |
| <input checked="" type="checkbox"/> | <a href="#">WP_010964563</a> | 72 | DFL--KN | YAEIIYGLAVVLLVINDI- FGSTRNGA---TGWIAI-GQ--RAI-QPSEFAKIALVIILAKKVDAMK                            | 135 |
| <input checked="" type="checkbox"/> | <a href="#">WP_052670071</a> | 81 | RHL--RT | YAAVIYGVALVLLVLVITP LGTTFGGA---QRWILI-GG--FQL-QPSELAKIAVLIAIAAVLHERK                            | 145 |
| <input checked="" type="checkbox"/> | <a href="#">WP_021295852</a> | 70 | RVL--RK | YRWWLYGISSFLLLVVFG <sup>L</sup> --PARNGA---HSWIDL-KV--VTV-QPSELAKIALIIWLAAFMADTD                | 132 |
| <input checked="" type="checkbox"/> | <a href="#">WP_004094495</a> | 69 | KSL--GK | MAHVLYGINLVMLLAVML- IGQSALGA---QRWIQI-GP--ISL-QPSEFSKLIMIISLAHILDKRS                            | 132 |
| <input checked="" type="checkbox"/> | <a href="#">AHC50233</a>     | 68 | KWL--MK | LALPFYVIGVLLLVGVEF- FGGETSKGA---TRWLNL-GV--TRI-QPSEMMKIAVPMMLAWYFQRHE                           | 131 |
| <input checked="" type="checkbox"/> | <a href="#">CAA74601</a>     | 66 | RAL--RT | AVPLLYGFSVFLILLVLTP LGSTINGA---HSWIKLpGG--FSL-QPSEFVKITIIILGIAMLLAARV                           | 131 |
| <input checked="" type="checkbox"/> | <a href="#">WP_011524430</a> | 68 | RKWknQT | LIYTLLGITLALLIAVFFV[1]---RSHGA---HRWIRL-GA--ASF-QPSELAKPAIILFLAFWLEPRI                          | 132 |
| <input checked="" type="checkbox"/> | <a href="#">WP_012256594</a> | 70 | RLL--SS | LARPLYVSTILLLGAVLVI -GRVSEGA---QSWIAI-GE--RTF-QPAELGKLVLIIALATYWQHYA                            | 133 |
| <input checked="" type="checkbox"/> | <a href="#">ABF88160</a>     | 59 | RWI--QR | MALPIYVGNILLI <sup>L</sup> ALRF- FGHTAKGA---ESWFVI-GP--FRM-QPAEFMKIGVVLMLAKVYHDDF               | 122 |
| <input checked="" type="checkbox"/> | <a href="#">WP_023036458</a> | 67 | RKY--YK | YSTAIYIFNILMLLSVLVI -GTSRLGA---KRWIDL-GP--LAL-QPSEFSKLLLIFTFSAYLINNY                            | 130 |
| <input checked="" type="checkbox"/> | <a href="#">WP_003815198</a> | 68 | NTL--MK | LALPFYV <sup>L</sup> GVILLLVGVEF- FGGETSKGA---TRWLNL-GV--TRI-QPSEMMKIAVPMMLAWYFQRHD             | 131 |
| <input checked="" type="checkbox"/> | <a href="#">WP_012893695</a> | 84 | RRL--RA | YAPLVYGLSLLGLFLVITP LGSTVNGA---HSWIMVgGG--FAF-QPSEFAKLGLVLM <sup>L</sup> AMLAQPA                | 149 |
| <input checked="" type="checkbox"/> | <a href="#">WP_010963045</a> | 61 | DFY--LK | HAYFFYVAAVISLLV <sup>V</sup> NF- FGSHIMGA---TRWIRI-GS--ISL-QPSEFAKVGLI <sup>L</sup> LALARYFDKQS | 124 |
| <input checked="" type="checkbox"/> | <a href="#">WP_015723471</a> | 69 | QRI--AK | FGYALYAIILALLIYTLL- FVKAIAGS---QRWIDL-GF--FNL-QPSEPAKLALILVLASCYAHM-                            | 131 |
| <input checked="" type="checkbox"/> | <a href="#">AIE75879</a>     | 86 | QVC--LK | LVPWF <sup>L</sup> IVVLLLI <sup>F</sup> LTKSG LGVEVNGA---RRWISL-GP--VLI-QPSEFMKPCLVLQSANLFGN--  | 148 |
| <input checked="" type="checkbox"/> | <a href="#">WP_015646126</a> | 43 | RTI--RN | FSIILYVFSVLLAALLV- KGTPIGGS---KRWFRV-MG--FSF-QPSDFAKLSLIVLLPYLEKR-                              | 105 |
| <input checked="" type="checkbox"/> | <a href="#">WP_006193613</a> | 68 | KAL--QN | YGRNLYIFNAVMLLLVMI- IGQTALGA---QRWIQI-GP--ITL-QPSEFSKIIMI <sup>I</sup> IALAAMLEDRV              | 131 |
| <input checked="" type="checkbox"/> | <a href="#">WP_012545997</a> | 71 | TKL--KK | LVFPLLIISFIMLIAV <sup>F</sup> SP LGVSAGGA---RRWLRL-WP--SVF-QPSELVKLAMVFFLAWYMSRE-               | 134 |
| <input checked="" type="checkbox"/> | <a href="#">WP_010943695</a> | 74 | RTW--RE | YAVPILLGCLFLLFLV <sup>F</sup> IP[1]IGGAAGKA---SRWIRL-PG--FNF-QPSELTKIALIVYMAYSLDKKQ             | 139 |
| <input checked="" type="checkbox"/> | <a href="#">WP_012963917</a> | 61 | RML--YD | MAPVIYMLNLF <sup>F</sup> LVLVPL- FGKTVYGA---KRWLDL-GP--FSL-QPSEFMKFSLLL <sup>F</sup> ITYILGHT-  | 123 |

|                                     |                              |     |            |                        |                                                     |     |
|-------------------------------------|------------------------------|-----|------------|------------------------|-----------------------------------------------------|-----|
| <input checked="" type="checkbox"/> | <a href="#">WP_012874018</a> | 73  | RFL--LN    | WKWVIYGLVFLFLTLV FVI   | -GHTAYGS---TRWIDL-GP--FPL-QPSELAKLLMV LVLVLAGFLCEKK | 136 |
| <input checked="" type="checkbox"/> | <a href="#">WP_010931982</a> | 65  | RVV--KD    | NAYFMYAAGIILLIAVLV-    | FGKKVAGA---TSWVRF-GM--FSF-QPSELTKMFTI IAMARFLSD--   | 126 |
| <input checked="" type="checkbox"/> | <a href="#">WP_003976192</a> | 92  | RAL--RT    | AVPLLYGFSVFLILLV LTP   | LGSTINGA---HSWIKLpGG--FSL-QPSEFVKITII LGMAMLLAARV   | 157 |
| <input checked="" type="checkbox"/> | <a href="#">WP_027868355</a> | 105 | EFW--QR    | YSATMLLGSII LLMI VLV-  | VGSSVKGA---SRWIDL-GL--LRI-QPAELTKLSLFCYIANYLVRKG    | 168 |
| <input checked="" type="checkbox"/> | <a href="#">WP_012546334</a> | 71  | IKL--KD    | FWLIFYITGILLII VLF T   | -GKTAMGA---KRWINL-GF--FSF-QPSEIFKII FII SISAFLEDKQ  | 134 |
| <input checked="" type="checkbox"/> | <a href="#">WP_011242757</a> | 78  | DNW--LK    | LQWWLYGVTCLSLIAVR FV   | -GTTALGA---ERWISI-GG--FNI-QPSEFAKPLMIVV LAAILSRET   | 141 |
| <input checked="" type="checkbox"/> | <a href="#">WP_013708713</a> | 87  | RNL--AN    | LSTVLIVIDIILIFSPYVP[1] | LSYSAKGM---TGWIKI-PLi gLTF-QPVELVKIVT IMFISALGAQYN  | 154 |
| <input checked="" type="checkbox"/> | <a href="#">WP_014546566</a> | 71  | DWL--KR    | AAVPSYVIALMLV FVLIF    | -AGDVKGA---GRWIDL-KV--IKL-QPSEFAKIAYLITISYWLSKHP    | 134 |
| <input checked="" type="checkbox"/> | <a href="#">WP_048435637</a> | 78  | RHI--RR    | MALVTYGLGIVLCIAATKY    | -GPEIKGA---HRWIQF-GS--IGV-QPSEFVKPAFVILA AWAFEGA    | 141 |
| <input checked="" type="checkbox"/> | <a href="#">WP_013127264</a> | 136 | TML--RR    | LALGSVLVSIALLIAVLIP[1] | IGSKVGGA---RRWIDV-GG--FTI-QPSEIAKVALI VWGAHLLADRS   | 201 |
| <input checked="" type="checkbox"/> | <a href="#">WP_011522270</a> | 65  | HLL--LG    | NAHWMYLVAIVALIAVRVF    | -GKKYLGA---RRWIQI-GG--NHF-QPSEWVKLIL I LAVAKYFAEEK  | 128 |
| <input checked="" type="checkbox"/> | <a href="#">WP_012683246</a> | 71  | RLI--EW    | SAWPLYALSCALLVLV LFI   | -GTGAGTAsvKGWLSI-GG--VRIgQPAELAKLAT TLM LARVLAAQR   | 138 |
| <input checked="" type="checkbox"/> | <a href="#">WP_010942720</a> | 67  | HLL--ED    | VAYWFYGILFLLLLV LAF[1] | --KTSMGA---TRWLHL-GF--ISV-QPSEPMKII GIITMARILANIP   | 130 |
| <input checked="" type="checkbox"/> | <a href="#">WP_011112575</a> | 70  | QRI--MR    | LAFPIYVMGIILLVAVAL-    | FGEVQNGA---RRWLNL-GF--INI-QPSELLKIAAP LMMSWYFDKA-   | 132 |
| <input checked="" type="checkbox"/> | <a href="#">WP_003114090</a> | 66  | RFM--AR    | WVPLGYLVGVALLVVVDV-    | IGHDAKGA---TRWINIpGV--IRF-QPSEFMKLLMPMTVAWYLSKR-    | 129 |
| <input checked="" type="checkbox"/> | <a href="#">WP_013066543</a> | 75  | WFW--RN    | VSGVIYTIALLLLLA VEF-   | VGDIGMGA---QRWLDL-GP--LRL-QPSEIMKIGLV MLLAAYYDWL-   | 137 |
| <input checked="" type="checkbox"/> | <a href="#">WP_011744311</a> | 63  | RVI--RD    | NAYLLYLISIFLLV VLL-    | FGTKIAGQ---TSWVKI-GF--FSF-QPSEIAKMATI LALARFLSD--   | 124 |
| <input checked="" type="checkbox"/> | <a href="#">WP_002853654</a> | 62  | RKF--IW    | IIPVAYWINIFLLLSVDI-    | FGVEKLG A---KRWLEI-PFthFTI-QPSEIFKPSFILMLAYLIYQNP   | 127 |
| <input checked="" type="checkbox"/> | <a href="#">WP_009963846</a> | 69  | KWV---R[1] | GGWIMYLAGIAGLILVKFI    | -GFGEKGA---HSKIHL-GP--VDV-QPSQLAIVATIVSIAVVLGDLH    | 132 |
| <input checked="" type="checkbox"/> | <a href="#">WP_012851903</a> | 91  | RLI--RA    | YAPIVYGLACVGLVAVLSP    | LGETINGS---HSWIVLgGG--FQV-QPSEFAKVGLV VLLAMLLAEPR   | 156 |
| <input checked="" type="checkbox"/> | <a href="#">WP_010881835</a> | 77  | ASL--RK    | ALSPLILVAFALCVCTFF-[2] | IGSTRNGA---TRWIKV-FD--INF-QPSEFVKLVLI VFLANFFDKHR   | 142 |
| <input checked="" type="checkbox"/> | <a href="#">WP_003867927</a> | 68  | TIL--KK    | LAGPLLIISIGLLIAVLIP[1] | IGVERYNA---TRWIGV-GS--FTI-QPSEVAKYALI IYLAKYFDKHP   | 133 |
| <input checked="" type="checkbox"/> | <a href="#">WP_012869947</a> | 72  | RRI--LE    | MSERIYGASLLLLFLV LVM   | -GHTAKGA---QSWFNL-GP--VRL-QPSELGKLALGV FMARHLCRFP   | 135 |

|                                     |                              |     |            |                         |                                                      |            |
|-------------------------------------|------------------------------|-----|------------|-------------------------|------------------------------------------------------|------------|
| <input checked="" type="checkbox"/> | <a href="#">WP_012639260</a> | 63  | DNL--KR    | WSPWIYVLGIGLLATVLV-     | MGEMGKGA---QRWLDL-GF--VRF-QPSELMKIAVPMMVAWYLAD--     | 124        |
| <input checked="" type="checkbox"/> | <a href="#">WP_013007878</a> | 70  | RFL--VK    | HSFLLYLLSLAILLLVLI-     | KGHIGMGA---QRWINI-AG--FRL-QPSEFIKVVWILFLAKQFAT--     | 131        |
| <input checked="" type="checkbox"/> | <a href="#">WP_010919421</a> | 77  | RWW--FM    | AAYPIYVVGLLLLIAVEV-     | AGDVSLGA---QRWLSI-GG--FRF-QPSEIMKIGLVLALARYYHGLS     | 140        |
| <input checked="" type="checkbox"/> | <a href="#">WP_012415416</a> | 83  | KIQ--EK    | INPMFIYGAWALLIIVL-      | FMPKVANV---HRWINL-GF--FNL-QPSEVAKPALMIYMAYYLSNIS     | 146        |
| <input checked="" type="checkbox"/> | <a href="#">WP_011564505</a> | 76  | RFW--QR    | LVKPIYLCVLLMLLAVLVV     | -GVAAGGA---QRWIDV-GP--VQV-QPSEFAKLMMVIVLAGYFAGRA     | 139        |
| <input checked="" type="checkbox"/> | <a href="#">WP_012411137</a> | 81  | QKI--LG    | VSHWFLLLFLALIFVTLI-[2]  | LGKKAFDA---ARWIAI-GP--IPI-QPSELIKPFLVLQSARLFGQ--     | 144        |
| <input checked="" type="checkbox"/> | <a href="#">WP_000131719</a> | 69  | RVY--EG    | WAPYLYIICIILLVAVDA-     | FGAISKGA---QRWLDL-GI--VRF-QPSEIAKIAVPLMVARFINR--     | 130        |
| <input checked="" type="checkbox"/> | <a href="#">WP_041571869</a> | 63  | E----KL    | IVKLGFTLFLLMVLMFVM[6]   | MATSAGGA---KRWIRL-PF--FSL-SPVEFFKIGFVVFLLAWSFSRKF    | 131        |
| <input checked="" type="checkbox"/> | <a href="#">WP_003033307</a> | 86  | KNY--EK    | NYNAFFVMLIVLVAVLVP[1]   | IGKSVNGA---RRWIPL-LI--INI-QVAELAKLLAIIFFSGYIAENL     | 151        |
| <input checked="" type="checkbox"/> | <a href="#">WP_011014922</a> | 103 | QTI--RN    | LSNLILIVSIVLLAVQIP[3]   | TGKEEVGS---QSWIAL-GP--IQF-QPSEIAKVAIAVWGAYLAGKG      | 170        |
| <input checked="" type="checkbox"/> | <a href="#">WP_012583594</a> | 65  | RLW--ER    | VWKYVYVINLFLLMVIF-      | FGKESLGA---QRWFSI-FG--FSF-QPSELSKLLLVISLSGFLTND      | 128        |
| <input checked="" type="checkbox"/> | Query_RodA Bs                | 136 | P[2]VRT    | LRDDIHLKKIaGVAVIPVGL-   | ILMQDAGTAGI-CMFIVLMVFMSGINWKLIAIIAGSG                | ILLISL 205 |
| <input checked="" type="checkbox"/> | <a href="#">KRL33981</a>     | 120 | T[4]HTM    | ASDWQLIGKLI-AYMVPVAILl  | KLQNDFGTMLV-FFAILGGVILVSGISWRLAPTFFAIV               | AAIAGT 191 |
| <input checked="" type="checkbox"/> | <a href="#">WP_013103083</a> | 147 | R[4]HNT    | MTDWL LLGKMA-LWFLPVAALi | ALQNDLGTLLV-FIAIFGGVALVSGVTWRILAPVIAAA               | AVVGAT 218 |
| <input checked="" type="checkbox"/> | <a href="#">WP_003866920</a> | 131 | - -EI      | KTFKELLWPMA-YLGI        | PFVAV-MLQPDLGTGLV-FIAIFLAIYVYISGIRTKVLAQLFALG        | IALLPI 195 |
| <input checked="" type="checkbox"/> | <a href="#">WP_054095977</a> | 136 | G[1]-PW    | SDLSSLGRICL-LFGV        | PFLII-LAQPD LGTSLI-LFGILLSM LLVSGLDWKWFVSGLLVI       | GSIAGS 202 |
| <input checked="" type="checkbox"/> | <a href="#">WP_015798384</a> | 146 | G --P      | RTWREVAVVLA-LGGV        | PALLV-VKQPDLGTGIV-VGIVTMVLLVMGGATGRQLLVILVAG         | --VLGI 208 |
| <input checked="" type="checkbox"/> | <a href="#">WP_012897546</a> | 142 | N[5]VLK[4] | -----LIGLLI-LETMP       | VAIIsVFQKDFGTFLV-FIAILAGIILVSGISWKILAPAF LFV[1]      | AVAGGI 214 |
| <input checked="" type="checkbox"/> | <a href="#">WP_012283736</a> | 131 | Q GRL      | ETLKDLLPCFA-FVAV        | PMLPI-LKQPDLGTSLV-FIAIMLGMLAAAGANKKVLGLLV FSG[1]     | VVVIVA 198 |
| <input checked="" type="checkbox"/> | <a href="#">WP_010964563</a> | 136 | D GIN      | NVK-NFFIILI-YAAI        | P TALV-LIQPDMGMAMV-YFFT VLGIVFAAGLDRVIFGGIFGI[1]     | VAVVGI 202 |
| <input checked="" type="checkbox"/> | <a href="#">WP_052670071</a> | 146 | G --E      | PGIGAI AVCLA-LTMV       | PMGLV-FLQPDLGTSIV-FVWLCAILFLVGGVKGRYLIGLGIAA         | --VTAT 208 |
| <input checked="" type="checkbox"/> | <a href="#">WP_021295852</a> | 133 | E[4]DYR[3] | -----VWVLA              | pIVLVPFALT-FEEPALGQALV-IIAMSLTMYTVFAKRTHFAMIMLLVL[3] | IGFSVA 204 |

|                                     |                              |     |      |        |                                                                                                                                                                                                            |        |     |
|-------------------------------------|------------------------------|-----|------|--------|------------------------------------------------------------------------------------------------------------------------------------------------------------------------------------------------------------|--------|-----|
| <input checked="" type="checkbox"/> | <a href="#">WP_004094495</a> | 133 | G    | -QL    | NTMKDVLPIFI-YVGI <b>PFLLV</b> -LK <b>QPD</b> LGTALV-FMAILFG <b>MLFI</b> AGIRMQLLGKIVGAG                                                                                                                    | IAFLPI | 198 |
| <input checked="" type="checkbox"/> | <a href="#">AHC50233</a>     | 132 | G    | -AV    | R-IRDFLAAAA-MLA <b>APFGLI</b> -VL <b>QPD</b> LGTALL-VFGAGFFV <b>IYFAG</b> LSFKLLVPVMLAG                                                                                                                    | IIAIGT | 196 |
| <input checked="" type="checkbox"/> | <a href="#">CAA74601</a>     | 132 | -[4] | RPH    | PDHRTVLQAL <b>G</b> -LATV <b>PMLIV</b> -ML <b>MPDL</b> GSVMV-MVIIVL <b>GILL</b> ASGASNRWIFGLLG--[2]TAGALA                                                                                                  | 201    |     |
| <input checked="" type="checkbox"/> | <a href="#">WP_011524430</a> | 133 | K    | TIT    | DWKHTLLPAAI-VTLML <b>VGII</b> -VK <b>QPD</b> LGTGIA-CVAIASS <b>MLFV</b> AGMEMKYFGYAAL--                                                                                                                    | AAILPM | 197 |
| <input checked="" type="checkbox"/> | <a href="#">WP_012256594</a> | 134 | D[5] | LVQ[3] | -----LL- <b>IAGV</b> <b>PMA</b> LI-FI <b>QPD</b> LGTTLV-LAGIWL <b>TM</b> AWGG <b>MRLV</b> QLITLFI <b>AA</b>                                                                                                | IPLAWI | 199 |
| <input checked="" type="checkbox"/> | <a href="#">ABF88160</a>     | 123 | Q[2] | APS    | YNLTRLWKPVL-VVFV <b>PFALV</b> -LV <b>QPD</b> LGTALM-IGLSSLT <b>IVL</b> FG <b>KVR</b> WYLVATLVA--[1]VF <b>AAGI</b>                                                                                          | 190    |     |
| <input checked="" type="checkbox"/> | <a href="#">WP_023036458</a> | 131 | S[1] | KYT    | -GFKAMFMSFL-HIF <b>P</b> FLI-A <b>VE</b> PD <b>LGT</b> SLV-IIL <b>IY</b> G <b>MLL</b> FL <b>NK</b> L <b>EW</b> KCIATV <b>FIS</b> I                                                                         | AAFIPI | 197 |
| <input checked="" type="checkbox"/> | <a href="#">WP_003815198</a> | 132 | G    | -AV    | R-IRDFVAAA-MLA <b>APFVLI</b> -VL <b>QPD</b> LGTALL-VFGAGFFV <b>IYFAG</b> LSFKLLVPCLLAG                                                                                                                     | IIAIGT | 196 |
| <input checked="" type="checkbox"/> | <a href="#">WP_012893695</a> | 150 | A[1] | TDR    | PRGLDV <b>GIALV</b> -VG <b>AFT</b> M <b>GLV</b> -ML <b>QPD</b> LGT <b>TMV</b> -LGVIT <b>AAAL</b> V <b>VAG</b> VRKR <b>WIG</b> L <b>ALLV</b>                                                                | VGGAVA | 217 |
| <input checked="" type="checkbox"/> | <a href="#">WP_010963045</a> | 125 | -[1] | YKM    | MEFKRLLK <b>ALI</b> -IIFL <b>PVFLV</b> -LK <b>QPN</b> LGT <b>AVI</b> -ML <b>FI</b> G <b>ISI</b> I <b>FTAI</b> IKRSHSVICGT--                                                                                | LGIFAV | 189 |
| <input checked="" type="checkbox"/> | <a href="#">WP_015723471</a> | 132 | -[2] | PGG    | YRLRDLIK <b>PVF</b> -LTAL <b>PVLI</b> -ML <b>QPD</b> LGT <b>ALI</b> -CAIIFV <b>SMTL</b> F <b>VRL</b> R <b>WST</b> L <b>GIL</b> SG--[2]LAC <b>IFI</b>                                                       | 199    |     |
| <input checked="" type="checkbox"/> | <a href="#">AIE75879</a>     | 149 | -    | WHR    | FPWRSRLL <b>LWG</b> -IFVV <b>TLGGI</b> -LI <b>QPN</b> L <b>STTAL</b> -CG <b>MGL</b> W <b>LIAL</b> AS <b>GLP</b> WG <b>YLV</b> STAL--                                                                       | LGITTA | 212 |
| <input checked="" type="checkbox"/> | <a href="#">WP_015646126</a> | 106 | -    | ---    | ----W <b>F</b> RS <b>FF</b> -LT <b>VV</b> <b>PAVLI</b> -F <b>L</b> EP <b>DL</b> G <b>T</b> TLS-V <b>GLI</b> W <b>LFAV</b> LAS <b>NVN</b> KK <b>PLV</b> ILLI--[1]VL <b>VFLP</b>                             | 163    |     |
| <input checked="" type="checkbox"/> | <a href="#">WP_006193613</a> | 132 | G    | -KL    | NTVSDIL <b>PVLG</b> -YVAL <b>PFFLV</b> -LK <b>QPD</b> LGTSLV-FIA <b>ILL</b> G <b>MMF</b> V <b>AGV</b> NLR <b>ILA</b> AG <b>FAAG</b>                                                                        | VAASPL | 197 |
| <input checked="" type="checkbox"/> | <a href="#">WP_012545997</a> | 135 | -[1] | YNK    | ESIKDFV <b>IPIS</b> -LMG <b>VFQIIF</b> -LK <b>QPD</b> FGAV <b>MT</b> -LGIIT <b>FV</b> ML <b>FI</b> G <b>V</b> SLR <b>FL</b> GLTIL--                                                                        | -LAIPV | 198 |
| <input checked="" type="checkbox"/> | <a href="#">WP_010943695</a> | 140 | D    | KVK    | FFSTG <b>FLPY</b> MV-LLSV <b>VLLIL</b> -LK <b>QHD</b> LGA <b>ALT</b> -M <b>GLV</b> AI <b>IML</b> FA <b>AGT</b> R <b>PRY</b> II <b>AM</b> GM--                                                              | MALPIL | 204 |
| <input checked="" type="checkbox"/> | <a href="#">WP_012963917</a> | 124 | -    | -KK    | S <b>VS</b> KESV <b>ILML</b> -A <b>FLI</b> <b>PAILT</b> -LK <b>QPD</b> LGT <b>AI</b> S-YGI <b>ILL</b> SL <b>LL</b> FF <b>KG</b> V <b>RLR</b> FF <b>FAL</b> GF--                                            | LLLVLS | 186 |
| <input checked="" type="checkbox"/> | <a href="#">WP_012874018</a> | 137 | R[1] | --E    | RDLKRLI <b>ISIC</b> -II <b>AP</b> T <b>ALV</b> -F <b>L</b> Q <b>PD</b> LGT <b>SMV</b> -L <b>GAA</b> W <b>SVL</b> V <b>LFG</b> G <b>IP</b> V <b>KY</b> LM <b>RL</b> F <b>LLL</b>                            | IPFAVI | 202 |
| <input checked="" type="checkbox"/> | <a href="#">WP_010931982</a> | 127 | -[2] | TDI    | GN <b>MDL</b> G <b>KALA</b> -I <b>ALV</b> <b>PAGLI</b> -ML <b>QPD</b> M <b>GTT</b> LT-CL <b>SF</b> I <b>VP</b> M <b>IV</b> LAG <b>FD</b> LY <b>YILL</b> GV <b>VPV</b> [15]I <b>AV</b> LS <b>M</b>          | 209    |     |
| <input checked="" type="checkbox"/> | <a href="#">WP_003976192</a> | 158 | -[4] | RPH    | PDHRTVLQAL <b>G</b> -LATV <b>PMLIV</b> -ML <b>MPDL</b> GSVMV-MVIIVL <b>GILL</b> ASGASNRWIFGLLG--[2]TAGALA                                                                                                  | 227    |     |
| <input checked="" type="checkbox"/> | <a href="#">WP_027868355</a> | 169 | D    | EVR    | NNLRG <b>FLK</b> PM <b>G</b> -V <b>ILV</b> <b>LAVLL</b> -L <b>AQ</b> PD <b>LGT</b> V <b>VV</b> -L <b>FV</b> T <b>T</b> LA <b>ML</b> FL <b>AG</b> AK <b>LW</b> Q <b>FIA</b> I <b>IG</b> --                  | MGISAV | 233 |
| <input checked="" type="checkbox"/> | <a href="#">WP_012546334</a> | 135 | S    | --P    | LSIKDTL <b>KTL</b> Li <b>FGII</b> <b>PFLLI</b> -VK <b>QPD</b> LGT <b>AIL</b> -IL <b>TIT</b> F <b>IMI</b> I <b>YK</b> GL <b>R</b> TR <b>LM</b> IL <b>LAIL</b>                                               | IISVFF | 200 |
| <input checked="" type="checkbox"/> | <a href="#">WP_011242757</a> | 142 | A[1] | --R    | --L <b>P</b> GL <b>IKAI</b> A-IMS <b>V</b> <b>PWLLI</b> -F <b>L</b> Q <b>PN</b> LGT <b>SLI</b> -F <b>GAI</b> V <b>FG</b> ML <b>Y</b> WAN <b>AK</b> PG <b>WLL</b> ML <b>SPL</b> [16]L <b>AI</b> V <b>TS</b> | 221    |     |

|                                     |                              |     |            |                                                                          |        |     |
|-------------------------------------|------------------------------|-----|------------|--------------------------------------------------------------------------|--------|-----|
| <input checked="" type="checkbox"/> | <a href="#">WP_013708713</a> | 155 | G[4]---    | --VRDYLKLCG-MLAVPVLAI-IALRDLGSIII-VLFAGAIVIMMSGAKKEWVLSTIALL             | AGLISL | 220 |
| <input checked="" type="checkbox"/> | <a href="#">WP_014546566</a> | 135 | V -SL      | YKLKSFVPLG-LFIVPFLLV-LKQPDLSALV-FTAVTLVGFFFAGLTFDTLFLIVSPA[18]           | AQICLV | 218 |
| <input checked="" type="checkbox"/> | <a href="#">WP_048435637</a> | 142 | R[4]-PG    | GTLAVLLLLPMT-----IVPLI--LQPDFGQTML-VTMVWCAMVVFVAGLHWFVWGGLGGAG           | --LVGV | 204 |
| <input checked="" type="checkbox"/> | <a href="#">WP_013127264</a> | 202 | R -RG      | GGLKDLLLPLGpVALLMAALV-IAEPNQSTAMI-IAVTAGMLLFYAGLSSRFLFSIGVAG             | --ICAA | 266 |
| <input checked="" type="checkbox"/> | <a href="#">WP_011522270</a> | 129 | S[1]EAS    | -GSDIVKVG-L-LVGVPFMLV-LAQPDLTALT-YLPVAIMGFFLGGMKAKHAVVILLLV              | ALVIPI | 194 |
| <input checked="" type="checkbox"/> | <a href="#">WP_012683246</a> | 139 | E -VP      | RSLIDLWRPLL-VVGI PWLLV-MKQPDLTGIV-FIGICFAMLFWAGVQWQLLLMLASPG[13]         | AWFLIL | 217 |
| <input checked="" type="checkbox"/> | <a href="#">WP_010942720</a> | 131 | V SGG      | LGLRELAFPAL-MIGAPAILI-MKQPDLTGAIL-VILIAGSMLAFVGIIRLSALAAVC---            | IATVPA | 194 |
| <input checked="" type="checkbox"/> | <a href="#">WP_011112575</a> | 133 | - HIT      | LRWRDYVVAVL-ILLLPVLII-ARQPDLTGALL-ILISGFYVIFLAGLSWRIIVGLAVAV             | AVSLPL | 198 |
| <input checked="" type="checkbox"/> | <a href="#">WP_003114090</a> | 130 | - NLP      | PGLKHMVISLA-IIITPFVLI-LKQPDLTGAML-ILASGGFVLFVGGLRWRWIVGAVSAA             | VPIAVA | 195 |
| <input checked="" type="checkbox"/> | <a href="#">WP_013066543</a> | 138 | -[2]EKV    | SSPIWVALPVA-LILMPFLV-LTQPDLTGAVM-LTLGGGFVMAAGVSLWYFGTIIA--[1]            | VVGL-- | 202 |
| <input checked="" type="checkbox"/> | <a href="#">WP_011744311</a> | 125 | -[2]TDI    | TFTPHLLIALG-IPLFPALLI-MLQPDMTTTLT-SLSFIIPMFIMSGFDLYIVIPYLLPI[15]         | LAVLLF | 207 |
| <input checked="" type="checkbox"/> | <a href="#">WP_002853654</a> | 128 | -[2]KNG    | YKLKQFIKLSF-YIILPFLII-AKEPDLGSAMV-LLLVGFGVLFIMGVHYKIWLSIVI--[1]          | ISVSPP | 194 |
| <input checked="" type="checkbox"/> | <a href="#">WP_009963846</a> | 133 | R[4]-FR[3] | --LRLGVSGIL--AGVPMLMV-LKEPDLGSAAV-YGPVVVAMLLVGSIPFRYLITLFLGV             | MCILPV | 202 |
| <input checked="" type="checkbox"/> | <a href="#">WP_012851903</a> | 157 | D[1]EPR[5] | PGGRDIVLALA-LAGGPAVLV-LAQPDLTGTTMV-FGAVVMGMLAVAGVRKRWLAGLAGAA            | VLAFA  | 229 |
| <input checked="" type="checkbox"/> | <a href="#">WP_010881835</a> | 143 | E HFD      | TPIRSIFPPFV-VSVIFVSVV-FFQNDFSTAMF-LLFITVVMFFIAGAPLWWFLRGIMVL             | --APIA | 207 |
| <input checked="" type="checkbox"/> | <a href="#">WP_003867927</a> | 134 | D YAK      | SFKKGVMPLG-LAGLFFGLI-MLQPNFSTAGI-IFIVAVIILFVAGAKLSFMGALFG--              | AGIGAA | 198 |
| <input checked="" type="checkbox"/> | <a href="#">WP_012869947</a> | 136 | P[1]DLR    | -S---IGMALG-LSGLSLALL-MLQPDLSALV-YCAMIGAGLWAAGIGSRYMGGLVTLG              | LMALPV | 199 |
| <input checked="" type="checkbox"/> | <a href="#">WP_012639260</a> | 125 | R PLP      | PRFLEVVAAGL-LALIPMVLII-ARQPDLTGALL-VGAAGLLVFLAGIRWRIIFALGALA             | LVALPV | 191 |
| <input checked="" type="checkbox"/> | <a href="#">WP_013007878</a> | 132 | -[2]IEY    | ATFLDIFKKLI-YLIPIFLLI-FLEPDLGTALV <sub>y</sub> VYLWGIGVLYLVKRYTVFITLII-- | IIIALP | 198 |
| <input checked="" type="checkbox"/> | <a href="#">WP_010919421</a> | 141 | -[2]SAR    | MSWR-LLIPAG-MIAAPVLLV-AHQPDLTGALL-IAATGLSIVVLVAGLSWRIIFAGIA--[1]         | FVAAIP | 206 |
| <input checked="" type="checkbox"/> | <a href="#">WP_012415416</a> | 147 | V SIS      | KSFATILPPLI-ITGVTLFLM-MLAPELGTPLV-LFCVVFLLLFVAGAKIKHLLLVLACS             | --VPII | 211 |
| <input checked="" type="checkbox"/> | <a href="#">WP_011564505</a> | 140 | V[1]---    | -DAGVFVRSLG-VVGAPALLV-FLQPDLTGALV-FGAVFVVMAYVGGARLWQLGALGAAG[1]          | LAAAAL | 204 |
| <input checked="" type="checkbox"/> | <a href="#">WP_012411137</a> | 145 | - WER      | ISWRVRFALG-IFGLVLLGI-LAQPNLSTTAL-CGMTIWLIALAAGLPYKYLGGTAIGG              | --VMLA | 208 |

|                                     |                              |     |      |     |                                                                |        |     |
|-------------------------------------|------------------------------|-----|------|-----|----------------------------------------------------------------|--------|-----|
| <input checked="" type="checkbox"/> | <a href="#">WP_000131719</a> | 131 | D    | VCP | PSLKNTGIALV-LIFMPTLLV-AAQPD LGTSIL-VALSGLFVLFSLGSLWRLIGVAVVLV  | AAFIPI | 197 |
| <input checked="" type="checkbox"/> | <a href="#">WP_041571869</a> | 132 | S[5] | PLV | DEMKIFAPYAA-LFLLA VFLIaVLQNDLGQIFL-LGITLALMVVFAGSSFRLLFFSLLMGA | --LILA | 202 |
| <input checked="" type="checkbox"/> | <a href="#">WP_003033307</a> | 152 | K    | KMA | NFKEGILTPIT-LLGCIAILL-LMQPDFGSTVV-ISICVMGMLFVAGNKVRWYGLLLG--   | TMVMA  | 216 |
| <input checked="" type="checkbox"/> | <a href="#">WP_011014922</a> | 171 | P[4] | --- | --FNNHLMRFG-GVGAFMAFLiFMEGDAGMAMS-FVLVVL FMLFFAGIAMGWIAIAGVLI  | --IAAL | 235 |
| <input checked="" type="checkbox"/> | <a href="#">WP_012583594</a> | 129 | -[2] | KKT | LGLREFILTLV-LVII PFI VV-MIQPDLGTAIV-IFATGIFMIFLSEISVKYFLRLIL-- | LGLLLL | 194 |

\*

|                                     |                              |     |           |                          |                                     |           |     |
|-------------------------------------|------------------------------|-----|-----------|--------------------------|-------------------------------------|-----------|-----|
| <input checked="" type="checkbox"/> | Query_RodA Bs                | 206 | ILLVM[ 9] | VGIQDYQIKRVTSW-VSASN     | ETQedsNSWQVDQA IMAIGSGGILNGISNLKV-  | ---YVP-ES | 277 |
| <input checked="" type="checkbox"/> | <a href="#">KRL33981</a>     | 192 | ALYLV[14] | ---KQYQFARIDTW-LNPST     | DTS---NNAYQVWQSMKAIGSQITGRGFNVSHV-  | ---TVP-VR | 262 |
| <input checked="" type="checkbox"/> | <a href="#">WP_013103083</a> | 219 | LLALV[14] | ---KLYQFDRIQTW-LHPDQ     | DTS---ASGYQTYQSLKAIGSQLTGNGFGDLKV-  | ---YVP-VR | 289 |
| <input checked="" type="checkbox"/> | <a href="#">WP_003866920</a> | 196 | G----     | [ 1]KLLKPYQRNLLSF-LNPEL  | DPM---GTGYHVIQSKIAIGSGMFWGKGLFDGSQT | QLYYLP-EA | 256 |
| <input checked="" type="checkbox"/> | <a href="#">WP_054095977</a> | 203 | VLLLY[ 8] | VILQPHQVKRIQIF-IDPAS     | DPS---GAGYQSTQAKIAIGSGMLHGKGFHQGTQA | QGNWIP-EP | 274 |
| <input checked="" type="checkbox"/> | <a href="#">WP_015798384</a> | 209 | IAVVH[ 2] | -LLKHYQLERLLSF-VNPQS     | ATQ---TYGYNLVQSKIAIGSGHIFGTGLFKGSQT | NLAYVP-EQ | 273 |
| <input checked="" type="checkbox"/> | <a href="#">WP_012897546</a> | 215 | VALVA[10] | TSFAQYQVNRFI AW-LHPFE    | YSQ---TFSLQQARSLISVGVGGLWGKGVGVANVN | ----VP-VR | 284 |
| <input checked="" type="checkbox"/> | <a href="#">WP_012283736</a> | 199 | IYGHL[ 5] | LPLKEYQIKRLIIF-LDPDL     | DPL---GDGYHIRQSLVAIGSGGLFGKGLFQGTQA | QLNFLP-EH | 267 |
| <input checked="" type="checkbox"/> | <a href="#">WP_010964563</a> | 203 | WNTSL     | --MQYWKARLTSF-LNPEK      | YSS---STGLQLIQSKIAIGSGGIFGKGLKGTQI  | QGGYIP-EN | 264 |
| <input checked="" type="checkbox"/> | <a href="#">WP_052670071</a> | 209 | IAVLR[ 3] | --IADYQVQRLTAF-LDASN     | PSL-gqGPGFQTRQSVIAIGSQVGGKGLFQGTQT  | SLSYVP-EN | 275 |
| <input checked="" type="checkbox"/> | <a href="#">WP_021295852</a> | 205 | AVMFS[15] | HILKSYQADRITW-LDPNY      | DVR---DAGYNIHMAQIAIGSQLFGEGLFNGET   | KGAWVP-NQ | 283 |
| <input checked="" type="checkbox"/> | <a href="#">WP_004094495</a> | 199 | F----     | [ 1]FFLKDYQKKRLTVF-MDPGT | DPL---GSGYHIIQSKIAIGSGMLYGKGLFSGTQS | QLNFLP-EN | 259 |
| <input checked="" type="checkbox"/> | <a href="#">AHC50233</a>     | 197 | LVYYE[10] | VVLHDYQKHRVCTL-LNPSS     | DPL---GKGFHTIQSMIAVSGGVYKGYMKGTQT   | HLDFIP-ER | 270 |
| <input checked="" type="checkbox"/> | <a href="#">CAA74601</a>     | 202 | VWQL-     | GILDDYQIARFAAF-ANPAL     | DPA---GVGYNTNQARIAIGSGGLTGSSLFEGSQT | TGRFVP-EQ | 264 |
| <input checked="" type="checkbox"/> | <a href="#">WP_011524430</a> | 198 | YWL--     | LFRVAFRRKRMLAF-LDPNA     | DPL---GTGFHMIQSLIAVATGGITGQGLMEGKQ- | KLFYLP-EP | 258 |
| <input checked="" type="checkbox"/> | <a href="#">WP_012256594</a> | 200 | AWHYV     | --LDTYQQVRLSTF-YYLLT[ 1] | PAAvdfNAAYNVIQALNAISSGGLTGTGLTRGLFS | QGNYPV-VQ | 265 |
| <input checked="" type="checkbox"/> | <a href="#">ABF88160</a>     | 191 | VIW--[16] | HHLKHKHSQRISGW-LDPEA     | DLR---GSYHAAQSKIAVSGGVSGKGWREGTQT   | GLRFLP-EQ | 268 |

|                                     |                              |     |           |                          |        |                                 |            |     |
|-------------------------------------|------------------------------|-----|-----------|--------------------------|--------|---------------------------------|------------|-----|
| <input checked="" type="checkbox"/> | <a href="#">WP_023036458</a> | 198 | SYKFL     | --LKAYQKDRIDTF-LNPEL     | DAL--- | GTGWNITQSKIAIGSGKIFGKGF LNNTQG  | KLKYLP-ES  | 259 |
| <input checked="" type="checkbox"/> | <a href="#">WP_003815198</a> | 197 | LIYYE[10] | VVLHDYQKHRVCTL-LNPSS     | DPL--- | GKGFHTIQSMIAVGSGLYGKGYMQGTQT    | HLDFIP-ER  | 270 |
| <input checked="" type="checkbox"/> | <a href="#">WP_012893695</a> | 218 | VWFLD     | -VLEPYQIARFTAF-LNPAS     | DPR--- | GVGYNSTQSLIAIGSGELFGKGLFDGGQT   | TGRFVP-EQ  | 280 |
| <input checked="" type="checkbox"/> | <a href="#">WP_010963045</a> | 190 | PAIW-     | PFLRPYHKQRILSF-LDSSV     | DPL--- | GIGYNAQQSQIAIGSGLLGKGFVNGSQT    | QLGF LP-EK | 252 |
| <input checked="" type="checkbox"/> | <a href="#">WP_015723471</a> | 200 | GWK--     | FLLKDYQRKRIETF-LNPEG     | DPM--- | NHGYQIMQSKIAVGS GKVF GKGFMEGTQG | HLHF LP-ER | 261 |
| <input checked="" type="checkbox"/> | <a href="#">AIE75879</a>     | 213 | VTSIS     | --IRDYQRARVTSF-LNPFA     | DPR--- | GDGYQLVQSLYAIASGGVLGRGFGMSQQ-   | KL FYLP-IQ | 273 |
| <input checked="" type="checkbox"/> | <a href="#">WP_015646126</a> | 164 | VFFF-     | FGLKDYQRARILSF-LNPEE     | YGE--- | SYSYNVLQSIHAIGAGGLFGAGYMKGKAN   | LMGYVP-VS  | 226 |
| <input checked="" type="checkbox"/> | <a href="#">WP_006193613</a> | 198 | L----     | [1]LFLKDYQKMR LKVF-LDPSV | DPL--- | GSGYHIIQSKIAIGSGLIFGKGLFGGTQS   | QLNF LP-EN | 258 |
| <input checked="" type="checkbox"/> | <a href="#">WP_012545997</a> | 199 | LFYLA     | --KEPYRWKRITSF-LDPWS     | DPQ--- | GSGFQLVQSLIALGSGGLTGQGLGEGKQ-   | KLAF LP-EI | 259 |
| <input checked="" type="checkbox"/> | <a href="#">WP_010943695</a> | 205 | YFLVM     | --NVDYRRRRILAY-LNPWE     | DPT--- | DTGFQIIQSWLAFNGGVLGQGLGEGKQ-    | KMFYLP-EA  | 265 |
| <input checked="" type="checkbox"/> | <a href="#">WP_012963917</a> | 187 | PLVW-     | HFLKDYQRERIMAV-IDPYA     | DYA--- | GSGYQLIQSVIAVSGGIVGKGLLKGTS     | HLLF LP-EK | 249 |
| <input checked="" type="checkbox"/> | <a href="#">WP_012874018</a> | 203 | GGRFL     | --LKPYQIERIAIF-LRPED     | NPF--- | GSGYNIIQATISVGS GGFWGQGFMSGSQS  | QLHYLR-VQ  | 264 |
| <input checked="" type="checkbox"/> | <a href="#">WP_010931982</a> | 210 | VMFFL[28] | VILKPHQIKRIQIF-LDPTA     | DPR--- | GAGYNALQAKIAIASGGIFGKGF LHGTQT  | QLRYIP-AQ  | 301 |
| <input checked="" type="checkbox"/> | <a href="#">WP_003976192</a> | 228 | VWQL-     | GILDDYQIARFAAF-ANPAL     | DPA--- | GVGYNTNQARIAIGSGGLTGSGLFEGSQT   | TGRFVP-EQ  | 290 |
| <input checked="" type="checkbox"/> | <a href="#">WP_027868355</a> | 234 | VLLIL     | --AEPYRIRRVTA F-WNPWE    | DPF--- | GSGYQLTQSLMAFGRGELWGQGLGNSVQ-   | KLEYLP-EA  | 294 |
| <input checked="" type="checkbox"/> | <a href="#">WP_012546334</a> | 201 | LWEIL[1]  | EGLKEYQKNRLIAF-IDPNI     | DPK--- | GIGYNIMQSVITVGS GGLFGKGFLEGTQG  | PLKF LP-ER | 265 |
| <input checked="" type="checkbox"/> | <a href="#">WP_011242757</a> | 222 | VGWKS[27] | NLLQDYQKDR LILF-LDPNK    | DPL--- | GGYNLIQARIAIGAGGIW GQGLNQGTT    | QLRFIP-EQ  | 312 |
| <input checked="" type="checkbox"/> | <a href="#">WP_013708713</a> | 221 | VLATN[11] | ALIKDYQMNRL LVF-MDPSK    | DTS--- | GAGYNLQQALIAVGS GGF FGKIGGASQA  | VSGF LP-EA | 295 |
| <input checked="" type="checkbox"/> | <a href="#">WP_014546566</a> | 219 | VFSVL[27] | NMLEPHQQKR VNTF-LDPMS    | DPL--- | GDGYQVLQSI TAIGSGGIGKGFNGSQT    | NLSF LP-EE | 309 |
| <input checked="" type="checkbox"/> | <a href="#">WP_048435637</a> | 205 | AAAYE[2]  | ----PHVRARITRF-MDKDS     | -----  | GDNFQTFWSQESFSSGGWLTGPGE GIAK   | --RHLP-DA  | 261 |
| <input checked="" type="checkbox"/> | <a href="#">WP_013127264</a> | 267 | VFLAL     | --VEGYRSARLA AW-LGRSN    | DAL--- | GVSYQSNQARYSLADGGFFGVGLGNSTA-   | KWSYLP-NA  | 327 |
| <input checked="" type="checkbox"/> | <a href="#">WP_011522270</a> | 195 | AWMKV     | --LKPYQKDR LTSF-VDPEA    | DPQ--- | KAGYQVLQSLVAVGS GGLTGK GIRKGSQT | QGSF LP-IP | 256 |
| <input checked="" type="checkbox"/> | <a href="#">WP_012683246</a> | 218 | VALVL[27] | DKLKP YQQRLLVF-LDPTI     | DMR--- | GSGYHVTQSKVAIGSGGLFGQGF TQGSQK  | RLQF LP-ER | 308 |

|                                     |                              |     |              |                             |        |                                     |           |     |
|-------------------------------------|------------------------------|-----|--------------|-----------------------------|--------|-------------------------------------|-----------|-----|
| <input checked="" type="checkbox"/> | <a href="#">WP_010942720</a> | 195 | VWL-- [ 3 ]  | YYLRDYQKNRVLNF-LDPER        | DPL--- | GTGYHIIQSKIAVGSGLFGKGFLOGTQS        | QLRFLP-EQ | 259 |
| <input checked="" type="checkbox"/> | <a href="#">WP_011112575</a> | 199 | LWTFG        | --MHDYQRKRVMTM-LDPSQ        | DAL--- | GAGYHTIQSSIAIGSGGISGKGWLKGTQS       | QLDFLP-EP | 260 |
| <input checked="" type="checkbox"/> | <a href="#">WP_003114090</a> | 196 | MWFFI        | --MHDYQKQRVLTF-LDPES        | DPL--- | GTGWNIIQSKAAIGSGGVFGKGWLLGTQS       | HLDFLP-ES | 257 |
| <input checked="" type="checkbox"/> | <a href="#">WP_013066543</a> | 203 | ----- [ 12 ] | QLLHDYQFKRIDTF-LDPSA        | DPL--- | GAGYNIMQAQIALGSGGWSGRGYMQGTQS       | HLNFLP-EK | 273 |
| <input checked="" type="checkbox"/> | <a href="#">WP_011744311</a> | 208 | LALWL [ 28 ] | ELLKPHQLKRIQTF-LDPMS        | DPR--- | GAGYNVIQAKIAISSGGFFGKGYLEGTQT       | QLRFIP-AQ | 299 |
| <input checked="" type="checkbox"/> | <a href="#">WP_002853654</a> | 195 | IIYT-        | HLLKPYQKQRIHDF-ISEKP        | -----  | SYQVAQSMIAIGNGLTGKSQDEATQT          | HFKFLP-IS | 252 |
| <input checked="" type="checkbox"/> | <a href="#">WP_009963846</a> | 203 | AYFFG        | --LKPYQKKRVEVF-VNMLT [ 4 ]  | DTL--- | GDAYMADKVKIAVGSAGFEGKGPLSSKVD [ 5 ] | RTFFTPtEA | 274 |
| <input checked="" type="checkbox"/> | <a href="#">WP_012851903</a> | 230 | VWFFG        | -LLKPYQIARFTAF-IDPEA        | DPR--- | GAGYNAQQARIAVGSGLTGKGLFEGET         | GGHFVP-EQ | 292 |
| <input checked="" type="checkbox"/> | <a href="#">WP_010881835</a> | 208 | VLMI-        | -VTSTNRLRRVLSF-LYPDR        | DPL--- | GAGYQVNAALEALMDGGLWGRGIGNGVR-       | KIASVP-EV | 268 |
| <input checked="" type="checkbox"/> | <a href="#">WP_003867927</a> | 199 | VVV--        | FSSFYIIRERVFTF-LNPWQ        | DIQ--- | KSGYQIVQSLYALGSGGLFGVGLGSRQ-        | KLMYLP-MP | 259 |
| <input checked="" type="checkbox"/> | <a href="#">WP_012869947</a> | 200 | AW-GF        | --LKPYQRMRLLVF-IDPKV        | DPL--- | GAGYNVIQSRIAVGSGLFGKGFMGGTQG        | RLHFIP-EP | 260 |
| <input checked="" type="checkbox"/> | <a href="#">WP_012639260</a> | 192 | LWHF-        | --MRPYQRQRVLTL-LNPES        | DPL--- | GAGYHIIQSKIAIGSGGLYGKGLNGTQS        | QLEFLP-ER | 252 |
| <input checked="" type="checkbox"/> | <a href="#">WP_013007878</a> | 199 | VGW--        | NHLKDYQKKRVITF-LNPEK        | DPF--- | GAGYHVIQSKIAIGSGGLKKGFLKGTQS        | HLKFLP-ER | 260 |
| <input checked="" type="checkbox"/> | <a href="#">WP_010919421</a> | 207 | PFVM-        | FVLHDYQRHRVMTF-LNPEA        | DPS--- | GKGYQIVQSKIALGSGGLLKGFLGGSQS        | QLNFLP-EK | 269 |
| <input checked="" type="checkbox"/> | <a href="#">WP_012415416</a> | 212 | LHQL-        | -IFYSYRLKRLFSF-LDPEE        | TAG--- | TTGYQLFQSFLAIGSGGWFGKGLGNSEL-       | KLQYLP-AA | 272 |
| <input checked="" type="checkbox"/> | <a href="#">WP_011564505</a> | 205 | LRFRL        | --LEEYQIARLTAF-LDPES        | AGE--- | IGYQVTQSKLAIGSGGLTGKGLDATTLA        | NLGFIP-ED | 265 |
| <input checked="" type="checkbox"/> | <a href="#">WP_012411137</a> | 209 | ILSI-        | -SIKEYQRKRVMSF-LNPWA        | DAT--- | GDGYQLVQSLLAVGSGRTWGAGFLSQQ-        | KLFYLP-IQ | 269 |
| <input checked="" type="checkbox"/> | <a href="#">WP_000131719</a> | 198 | LWFFL        | --MHDYQRQRVMLL-LDPES        | DPL--- | GAGYHIIQSKIAIGSGGLRGKGLHGTQS        | QLEFLP-ER | 259 |
| <input checked="" type="checkbox"/> | <a href="#">WP_041571869</a> | 203 | IAVI-        | -ISSDHQILRIKLWwANAQN [ 16 ] | ENL--- | PEPYQIHHSLSIQNGGFFGEGLGNGLI-        | KLGFIP-ES | 280 |
| <input checked="" type="checkbox"/> | <a href="#">WP_003033307</a> | 217 | AMLVI        | --ISPYRMHRITGF-LHPWE        | NAN--- | GSGYQLVQALIGFGRGGWFGDGLGNGIQ-       | KQFFIP-EA | 277 |
| <input checked="" type="checkbox"/> | <a href="#">WP_011014922</a> | 236 | AVLAL [ 2 ]  | ----GFRSSRFVY-FDALF [ 4 ]   | DVR--- | GIAFQSYQGFSLADGSGLVGLGQSRA-         | KWFYLP-EA | 300 |
| <input checked="" type="checkbox"/> | <a href="#">WP_012583594</a> | 195 | PFFW-        | LILKPYQQRIITF-LDPMK         | DPL--- | GSGYQVIQSLIAIGSGGIWKGWFQGTQT        | HLNLIP-EQ | 257 |

\*

|                                     |                              |     |                                                                                     |     |
|-------------------------------------|------------------------------|-----|-------------------------------------------------------------------------------------|-----|
| <input checked="" type="checkbox"/> | Query_RodA Bs                | 278 | TTDFIFSIIIGESFGFIGCAIVVIMFFFLIYRLVVLIDK-ihPFNRFASFVCVG-YTALIVIHTFQNIIGNIGIMPVTGIP   | 355 |
| <input checked="" type="checkbox"/> | <a href="#">KRL33981</a>     | 263 | ESDMIFSVIGENFGFIGCAVVILLYFLLIYQMIRVTFD---TKNEFYAYISTG-VIMMILFHVFENIGMSIGLLPMTGIP    | 338 |
| <input checked="" type="checkbox"/> | <a href="#">WP_013103083</a> | 290 | ESDMIFSVIGESFGFIGGALLIALYFGLIYRLIRATFK---AQNAFYAYIATG-VVMMVLHFVFENIGMSIGLLPLTGIP    | 365 |
| <input checked="" type="checkbox"/> | <a href="#">WP_003866920</a> | 257 | WTDFIFS SVGEELGFIGASILIVLYAIMLYRAWKIAYN---AKDKYGMLVAVG-IIAMFTFHIFENIGMTIGIMPITGIP   | 332 |
| <input checked="" type="checkbox"/> | <a href="#">WP_054095977</a> | 275 | HNDFIFAVYAEFEGFIGASILICAYLLLIYRMLVVALR---SDHLFGTYIVAG-VMGMFVFQIYQNIGMTIGLMPITGIP    | 350 |
| <input checked="" type="checkbox"/> | <a href="#">WP_015798384</a> | 274 | QTDFIFTAVGEQLGFIGAGSLVLVYGIMLARSYRVLRS---AADRVSMMLLVAG-AIAWIGFSVFQNIGMTIGIMPITGIP   | 349 |
| <input checked="" type="checkbox"/> | <a href="#">WP_012897546</a> | 285 | ESDMIFTVIAEDFGFVGS AFLIFLYFMLIYRMIRVTFK---SNNQFYTYISTG-IIMMILFHVFENIGAAIGVVPLTGIP   | 360 |
| <input checked="" type="checkbox"/> | <a href="#">WP_012283736</a> | 268 | HTDFVFSVGEELGFIGAVALLALFFV IILRGLRIALD---ARDTFGSLIVTG-IVSMWLFHVLVNVGMTTGIMPVTGIP    | 343 |
| <input checked="" type="checkbox"/> | <a href="#">WP_010964563</a> | 265 | YTDFIFS SVGEEWGLIG AIVLMLLYIILYRIIKMSK---nSKDAFGKIFCVG-MASTFLFSVYQNMGMTIGIAPISGLT   | 340 |
| <input checked="" type="checkbox"/> | <a href="#">WP_052670071</a> | 276 | HTDFIFTVIGEEFGFLGAMIVLGLFLVLIWRGLRIAVI---AKDLFGTLLAVG-VVAMLALQVFNVGMVTGIMPVTGIP     | 351 |
| <input checked="" type="checkbox"/> | <a href="#">WP_021295852</a> | 284 | WTDYIFSAIGEEFGFVGA AVLVLFLILMYRLVKIAAT---TDDPFGMYMAIG-VIGMFSFQVFENIGMDMYLSPSTGIT    | 359 |
| <input checked="" type="checkbox"/> | <a href="#">WP_004094495</a> | 260 | HTDFIFAVIGEEVGFIGSVLVLALYMLLLYRGVKIAGA---ARDNFGTLLAAG-IVSMLAFHLLVNVGMTAGIMPVTGIP    | 335 |
| <input checked="" type="checkbox"/> | <a href="#">AHC50233</a>     | 271 | TTDFIFAVYAEFEGFLYGGIAILVLYGLMMARGLTIASR---ASSQFGRLLSGA-LTMMLFYVFNVGMVTGILPVVGV      | 346 |
| <input checked="" type="checkbox"/> | <a href="#">CAA74601</a>     | 265 | QTDFVFTVAGEELGFLGAGLI IALLGVVLRGCR IARS---TPDLYGTVVAAG-IVAWFAFQTFENVGMTLGIMPVTGLP   | 340 |
| <input checked="" type="checkbox"/> | <a href="#">WP_011524430</a> | 259 | HTDFIFAVTSEELGLVGSVTVLLFAIFLYRGIRAAVM---TEDTFGRLLATG-ITAMVVQAFFNVSVLGLLPKGTGIP      | 334 |
| <input checked="" type="checkbox"/> | <a href="#">WP_012256594</a> | 266 | HTDFIFAVIGEELGFIGGVVLIIFQAVVLWQTL SIAGK---ARDQFGRLIALG-IFGMLFSHTVINIGMNM SLLPVTGLP  | 341 |
| <input checked="" type="checkbox"/> | <a href="#">ABF88160</a>     | 269 | HTDFIFS VWAEHGFVMCIVLLVLYGAIFIFGLGVGFN---ARDRFGAFVAVG-VVAMLFWQVFENIGMVI GLLPVTGIT   | 344 |
| <input checked="" type="checkbox"/> | <a href="#">WP_023036458</a> | 260 | HTDFIGSVFLEERGF LGGSMLLLIYIVLLAQIIYIADT---TEDKFGKYVCYG-VATIFFFHIFVNMGMIMGIMPVTGLP   | 335 |
| <input checked="" type="checkbox"/> | <a href="#">WP_003815198</a> | 271 | TTDFIFAVYAEFEGFLYGGVALLVLYGLFMARGLAIASR---ASSQFGRLLAGA-ITMMMFYVFNVGMVTGILPVVGV      | 346 |
| <input checked="" type="checkbox"/> | <a href="#">WP_012893695</a> | 281 | HTDFIFTVAGEEFGFLGSVTVVAL LGVILLRGMRIARQ---CDDRFGTLTAGV-IVCWLA FQS FVNIGMTIGIMPITGLP | 356 |
| <input checked="" type="checkbox"/> | <a href="#">WP_010963045</a> | 253 | RTDFAFAVLSEEWGFLGSMALILLYTSLLGIIFS IAYR---SKNYFSKSI SIG-IFAF FSAHFFINIGMTMGLLPVIGDP | 328 |
| <input checked="" type="checkbox"/> | <a href="#">WP_015723471</a> | 262 | HTDFAFSVWAEWGFAGSLFFLSCYFFMLIWGINIAMS---AKDKFGSILAFG-CIMLIFWQAVINLFMIMGFLPVVGV      | 337 |
| <input checked="" type="checkbox"/> | <a href="#">AIE75879</a>     | 274 | TTDFIFAVFAEEFGLIGCIVFLFLGLFTTMGLRVAMR---CRHRVKRLIGLG-VVIFLVGQSLLNIGVASGALPTTGLP     | 349 |

|                                     |                              |     |                                                                                     |     |
|-------------------------------------|------------------------------|-----|-------------------------------------------------------------------------------------|-----|
| <input checked="" type="checkbox"/> | <a href="#">WP_015646126</a> | 227 | YTD FIVSVIGEEFGF IGIVFLLSLFGLLFFEVSRLWLN---VKDEYWEILMVS-ACGLIWFHVFENVSMNLGLLPVTGVP  | 302 |
| <input checked="" type="checkbox"/> | <a href="#">WP_006193613</a> | 259 | HTDFIFAVVGEELGFVGA AALLLLYLVLWRGVKIARD---ASDTFGRLLAGV-ITSM LAFHVLVNVGMTTGIMPVTGIP   | 334 |
| <input checked="" type="checkbox"/> | <a href="#">WP_012545997</a> | 260 | HTDFIFAHIGEEMGF IGVCVVILFFFICMRGLNIAAK---QIDPFCYFLASG-ITIMISIQALINFAVVTGLAPTGLP     | 335 |
| <input checked="" type="checkbox"/> | <a href="#">WP_010943695</a> | 266 | HTDFILSVTGEELGLIGVTVIAAMFLMLVLRGVRVALM---AQEPFGRFLAFG-IATLLGIQSFVNMAVVTGLLPVKGLA    | 341 |
| <input checked="" type="checkbox"/> | <a href="#">WP_012963917</a> | 250 | HTDFIFSVAEEGGFVLSLLLLSLYFLLIYRLITYGMR---IYDGNQRLFLGG-AVSLLLFQVFVNLMMTMGLMPVVGIP     | 325 |
| <input checked="" type="checkbox"/> | <a href="#">WP_012874018</a> | 265 | HTDFIASVIGEEFGF IGMALLVVYGLLLWRIIRIASK---ARDKYGELI AVG-VAAIILFQVFVNIGMNIQLMPVTGIP   | 340 |
| <input checked="" type="checkbox"/> | <a href="#">WP_010931982</a> | 302 | WTDFIFCVIAEELGFLGSTLLLLLFAALVLRLLVWVGA---IKNRFVELLLAG-YASLLTHVVINIGMTIGVMPVIGVP     | 377 |
| <input checked="" type="checkbox"/> | <a href="#">WP_003976192</a> | 291 | QTDFVFTVAGEELGFLGAGLI IALLGVVLWRGCRIARS---TPDLYGTVVAAG-IVAWFAFQTFENVGMTLGIMPVTGLP   | 366 |
| <input checked="" type="checkbox"/> | <a href="#">WP_027868355</a> | 295 | HTDFIFAIIGEELGYVGVV LALLMVFFVAFRAMS IGRKaleIDHRFSGFLACS-IGIWF SFQALVNVGAAAGMLPTKGLT | 373 |
| <input checked="" type="checkbox"/> | <a href="#">WP_012546334</a> | 266 | HTDFIFPIFAEEWGF IGCLILLSLYFTFFIRCFQTSII---AKNNFGKLLALG-FTSIFILYFFINIGMTLGIMPVVGIP   | 341 |
| <input checked="" type="checkbox"/> | <a href="#">WP_011242757</a> | 313 | HTDFIFSAVGEELGFVGSIAVILLFWLVCWRLIAIATS---ARDNFGSLLAIG-VLSMLVFQIVINIAMI TIGLGPVTGIP  | 388 |
| <input checked="" type="checkbox"/> | <a href="#">WP_013708713</a> | 296 | QTDFVFALLSEEFGF IGAFLLLVLF AWLILSAIRVAVK---TDNLFMKLV CVG-IVGMWTFQVFENVGMCIGLMPITGIP | 371 |
| <input checked="" type="checkbox"/> | <a href="#">WP_014546566</a> | 310 | HTDFIFSVLGEQGFVGC AVILVLF TFLWRASSICKT---NDDPFVTLVTMG-AATIFLFHITVNIAMI TIGLMPVTGLP  | 385 |
| <input checked="" type="checkbox"/> | <a href="#">WP_048435637</a> | 262 | HTDFIFS VAGEEFGV IICIGIVLLFAFIVMRGLV LARR---SDDIFCRLAITG-LTALFGLQACINMAVNVRLMPAKGMT | 337 |
| <input checked="" type="checkbox"/> | <a href="#">WP_013127264</a> | 328 | HND FIFAIIGEELGYLGAGV VILMFGLLTWVGLRIACR---VADPFLQLMAAT-ITTLIALQAIINMGYVVG LLPVTGIQ | 403 |
| <input checked="" type="checkbox"/> | <a href="#">WP_011522270</a> | 257 | QTDFIFAAFSEEHG FVGAIFLLLLYFV VLMRLIHDAQT---APDRAGTFIVMG-VVAVLAFHILVNVGMVVGFM PVTGIP | 332 |
| <input checked="" type="checkbox"/> | <a href="#">WP_012683246</a> | 309 | HTDFIFS VVGEELGFLGV SIALALFLALFLRSTRVASR---ANDAFPSLVAFG-FVAAWFVHVMVNVGMTLNLM PVTGIP | 384 |
| <input checked="" type="checkbox"/> | <a href="#">WP_010942720</a> | 260 | HTDFAFSVFAEEWGFV GSVLVL LLYAVLTLWGLQIARR---CNDRFGSLVAVG-VTAMLFWHIIINIGMVI GLFPVVGVP | 335 |
| <input checked="" type="checkbox"/> | <a href="#">WP_011112575</a> | 261 | STDFIFS VVSEEFGLIGN SLLLSLYLIVIGRCLVITAR---APTRFTRLVAGS-ITLTFFTYVFNMG MVSGILPVGIP   | 336 |
| <input checked="" type="checkbox"/> | <a href="#">WP_003114090</a> | 258 | HTDFIIAVLGE EFGLVGVCLLLVLYLL LISRGLVITAQ---AQ TLYGKLLAGG-ITMTFFVYVFNIGMVSGLLPVVGVP  | 333 |
| <input checked="" type="checkbox"/> | <a href="#">WP_013066543</a> | 274 | HTDFIFTTLAEEFGF IGAFGLLSLYVGI AFATYTALS---TKDRYASLVSLG-VAGTFFF FAINMGMMGLMPVVGVP    | 349 |
| <input checked="" type="checkbox"/> | <a href="#">WP_011744311</a> | 300 | WTDFIFCVIAEELGFVGSFV LLLLFLVLILRLLWIISS---IKNKVELTLAG-FVSLLLIHVIINIGMTIGLIPVIGVP    | 375 |
| <input checked="" type="checkbox"/> | <a href="#">WP_002853654</a> | 253 | TSDFIFAYMIERFGF IGGLTLIIFYILLIFHLLSLNYK---LKDDYFARVAINcVALFIFIYAAVNISM TIGFAPVVGIP  | 329 |

|                                     |                              |     |                                                                                   |     |
|-------------------------------------|------------------------------|-----|-----------------------------------------------------------------------------------|-----|
| <input checked="" type="checkbox"/> | <a href="#">WP_009963846</a> | 275 | INDFIYSVIVEEFGFRGLLQIVVMALLLQCIFVSFY---ARDNLGRLIVVG-IVGMLFAHSMQNMGMNILMMPITGLP    | 350 |
| <input checked="" type="checkbox"/> | <a href="#">WP_012851903</a> | 293 | QTDFIFTVAGEELGFIGSALLIGLLGVVLRGLRIATA---AADPFGALVAAG-VVCWLGFTFENIGMTLGIMPITGLP    | 368 |
| <input checked="" type="checkbox"/> | <a href="#">WP_010881835</a> | 269 | YSDFI FVVIGEEMGFIVCLYLMLLFAFTLTGISIALR---CANRFNTFLAFG-ASAAIVLQSIILNVAVVRLVPATGIP  | 344 |
| <input checked="" type="checkbox"/> | <a href="#">WP_003867927</a> | 260 | HNDFIFSIIGEELGLVGTVTILLMFLYLILRGLRVAAK---APDMFGCLLATG-ITSLIGVQTLINAVAVATSSMPPTGVS | 335 |
| <input checked="" type="checkbox"/> | <a href="#">WP_012869947</a> | 261 | HTDFIFSVFAEEFGFVGGVAAVLLFVALIWRIFQIAFE---ARDLRAKVLCSM-LGAWMFFQTFESIAMSGLAPVTGLP   | 336 |
| <input checked="" type="checkbox"/> | <a href="#">WP_012639260</a> | 253 | STDFIFAVYAEFGLLGLLLLSLYLLVILRGLYISVK---AQDAYARLLGGS-LSLTFVYLFVNVGMVSGLLPVVGV      | 328 |
| <input checked="" type="checkbox"/> | <a href="#">WP_013007878</a> | 261 | HTDFIFSLICEEFGFVGGATLLSLFLLLMRIIYIAIL---TKEPSGKLIALL-TAALIFFQTYVNAAMTMGIMPVVGIP   | 336 |
| <input checked="" type="checkbox"/> | <a href="#">WP_010919421</a> | 270 | QTDFIFATLAEFGFVGCFAVLFLYGAVIFMALRIASI---SHSHFGRLAAGG-TISTFAVYVFLINGAMVMGMAPVVGVP  | 345 |
| <input checked="" type="checkbox"/> | <a href="#">WP_012415416</a> | 273 | HTDFIFAIISEEIGLFGSLIIIAFFVWLLVCGVNIARR---SKNTFNMLALG-LTLTITLQAFFNMGVATGLLPTKGLP   | 348 |
| <input checked="" type="checkbox"/> | <a href="#">WP_011564505</a> | 266 | HTDFIFANLAERVGFAGSFLLLLLLFFLLIWRILHIATI---SRDRFGVLISVG-VATIFLFHVFNVMGTMGIMPVTGIP  | 341 |
| <input checked="" type="checkbox"/> | <a href="#">WP_012411137</a> | 270 | DTDFIFAVFAEEFGFVGSMLLALLATFATLGLIVALK---AKNTVHRLVAIG-VTIVMVGQSLHIGVATGSLPTTGLP    | 345 |
| <input checked="" type="checkbox"/> | <a href="#">WP_000131719</a> | 260 | HTDFIFAVLAEELGLVGLILILLALYILLIMRGLWIAAR---AQTFGRVMAGG-LMLILFVYFVNIGMVSGLPVVGV     | 335 |
| <input checked="" type="checkbox"/> | <a href="#">WP_041571869</a> | 281 | HTDIVLAGIAEETGFVGLFFCTLLFCAIIYRIFKIANR---SENNVFYLFVCG-AGILLSFSFMINAYGISGITPIKZIA  | 356 |
| <input checked="" type="checkbox"/> | <a href="#">WP_003033307</a> | 278 | HTDFITSVIAEELGVVGLMVLLAVYLFIVFRAMSIAKMaFeLNRYYQAFLAYG-VGFWIAFQVFNIGVNTGLLPTKGLT   | 356 |
| <input checked="" type="checkbox"/> | <a href="#">WP_011014922</a> | 301 | KNDFIFAIIGEELGLWGGALVIALFAGLLYFGLRTAKK---SHDPFLGLMAAT-LTASVVSQAFINIGYVVGLLPVTGIQ  | 376 |
| <input checked="" type="checkbox"/> | <a href="#">WP_012583594</a> | 258 | HTDFIFSAIGEEFGFVGLFVFLYLLFRYTWEIWGS---LKDKFGKYIVGG-ILFCWFFQTFINLCMVSGISPVVGIP     | 333 |

\*

|                                     |                              |     |                                           |     |
|-------------------------------------|------------------------------|-----|-------------------------------------------|-----|
| <input checked="" type="checkbox"/> | Query_RodA Bs                | 356 | LLFVSYGGSSTLSTLIGFGIVYNASVQLTKYRSYL[ 3 ]  | 393 |
| <input checked="" type="checkbox"/> | <a href="#">KRL33981</a>     | 339 | LPFISQGGSSALIANMAGI GLMMSRYHYKSYMFSR[ 5 ] | 378 |
| <input checked="" type="checkbox"/> | <a href="#">WP_013103083</a> | 366 | LPFISQGGSSLLGNLIGVGLILITIGYQQNATFTE[ 6 ]  | 406 |
| <input checked="" type="checkbox"/> | <a href="#">WP_003866920</a> | 333 | LPFMSYGGSSAMVANMMAIGLLENISMRRQKINF--      | 365 |
| <input checked="" type="checkbox"/> | <a href="#">WP_054095977</a> | 351 | LPLISYGGSSLLTQMLAIGFVVNVGMRTQTDALSF       | 385 |
| <input checked="" type="checkbox"/> | <a href="#">WP_015798384</a> | 350 | LPFVSYGGSAMLGSSAVGIVLSAGSRRLRRAS--        | 382 |

|                                     |                              |     |                                             |     |
|-------------------------------------|------------------------------|-----|---------------------------------------------|-----|
| <input checked="" type="checkbox"/> | <a href="#">WP_012897546</a> | 361 | LPFISQGGSSALMANIIGLGLVLSMKYNQLPEFVKE [ 19 ] | 414 |
| <input checked="" type="checkbox"/> | <a href="#">WP_012283736</a> | 344 | LPFVSYGGSSAMLTNLVCLGLLLNVHWRRQSIMF--        | 376 |
| <input checked="" type="checkbox"/> | <a href="#">WP_010964563</a> | 341 | LPFMSYGGSSMFTAFIAIGIILSIGVRKNKINF--         | 373 |
| <input checked="" type="checkbox"/> | <a href="#">WP_052670071</a> | 352 | LPFVSYGGTSLIVWFAIVGLLLNVHMRRF-----          | 380 |
| <input checked="" type="checkbox"/> | <a href="#">WP_021295852</a> | 360 | LPFISYGGTSLVIDYVAVGLVLSVGVRRRKLRFD-         | 393 |
| <input checked="" type="checkbox"/> | <a href="#">WP_004094495</a> | 336 | LPLMSYGISALTTNMVSLGILLNIYMRRQKIMF--         | 368 |
| <input checked="" type="checkbox"/> | <a href="#">AHC50233</a>     | 347 | LPFMSYGGTALFTMGIAFGIMMSISRHRSVKS---         | 378 |
| <input checked="" type="checkbox"/> | <a href="#">CAA74601</a>     | 341 | LPFVSYGGSSMFAVWIAVGLLQSITVQRP----MS [ 1 ]   | 372 |
| <input checked="" type="checkbox"/> | <a href="#">WP_011524430</a> | 335 | LPFVSYGGSSLFMTLASVGVLLNITQQAE-----          | 363 |
| <input checked="" type="checkbox"/> | <a href="#">WP_012256594</a> | 342 | LPFVSAGGSFMVTTLIAIGLLQSISLRHRHIAF--         | 374 |
| <input checked="" type="checkbox"/> | <a href="#">ABF88160</a>     | 345 | LPLMSYGGSSLLSVMLSIGLLVNISMRRH----MF         | 375 |
| <input checked="" type="checkbox"/> | <a href="#">WP_023036458</a> | 336 | LLLMSYGGSSLVFSFLILGVVQSVKIHRGNK----         | 366 |
| <input checked="" type="checkbox"/> | <a href="#">WP_003815198</a> | 347 | LPFMSYGGTALLTMGIACGILMSISRRRPAPA---         | 378 |
| <input checked="" type="checkbox"/> | <a href="#">WP_012893695</a> | 357 | LPFVSYGGTATFANMIAIGLLQAIHIREQSF----         | 387 |
| <input checked="" type="checkbox"/> | <a href="#">WP_010963045</a> | 329 | LPFLSYGGSTTAASLICIIGLLLAIKADEQ-QNACI [ 5 ]  | 367 |
| <input checked="" type="checkbox"/> | <a href="#">WP_015723471</a> | 338 | LPLFSYGGSSLLTNMVAIGILMNVRMRSF----PT [ 6 ]   | 374 |
| <input checked="" type="checkbox"/> | <a href="#">AIE75879</a>     | 350 | LPFFSYGGSSCLSSLVLAGLLVRVARESNEAEVIP [ 9 ]   | 393 |
| <input checked="" type="checkbox"/> | <a href="#">WP_015646126</a> | 303 | LPFISYGGTSTLVFSILVGLLILKGIALAR-----V [ 4 ]  | 336 |
| <input checked="" type="checkbox"/> | <a href="#">WP_006193613</a> | 335 | LPLMSYGVSSLTTLNLIATILLNIHMRKAKFVF--         | 367 |
| <input checked="" type="checkbox"/> | <a href="#">WP_012545997</a> | 336 | LPFISYGGSSLVVNLIAVGVLLNLSRFDYKADFTE [ 22 ]  | 392 |
| <input checked="" type="checkbox"/> | <a href="#">WP_010943695</a> | 342 | LPFISYGGSSLIVTLFAVGILLNISTRKLGAP---         | 373 |
| <input checked="" type="checkbox"/> | <a href="#">WP_012963917</a> | 326 | LPFVSFGGSVLTFSMLLGVCFIVREYRLKDIHF [ 4 ]     | 364 |
| <input checked="" type="checkbox"/> | <a href="#">WP_012874018</a> | 341 | LPFISYGGSSLVTLTSEGILQSIILRHKKVNL--          | 373 |

|                                     |                              |     |                                              |     |
|-------------------------------------|------------------------------|-----|----------------------------------------------|-----|
| <input checked="" type="checkbox"/> | <a href="#">WP_010931982</a> | 378 | LPFISYGGSSLVANMMMVGLAMNFSKNRR----HI [ 2 ]    | 410 |
| <input checked="" type="checkbox"/> | <a href="#">WP_003976192</a> | 367 | LPFVSYGGSSMFAVWIAVGLLQSITVQRP----MS [ 1 ]    | 398 |
| <input checked="" type="checkbox"/> | <a href="#">WP_027868355</a> | 374 | LPLISYGGSSLLIMSTAIMLLRIDYETRLEKAQA [ 6 ]     | 414 |
| <input checked="" type="checkbox"/> | <a href="#">WP_012546334</a> | 342 | LPFMSYGGTTLLANFIGIALVINVRMRRFELFYP-          | 375 |
| <input checked="" type="checkbox"/> | <a href="#">WP_011242757</a> | 389 | LHWLSYGRSALLANFIAIGIVESVWRFRQISRY--          | 421 |
| <input checked="" type="checkbox"/> | <a href="#">WP_013708713</a> | 372 | LPFISFGSSSMIIQCAVGLVQSIWRHHVSR----           | 402 |
| <input checked="" type="checkbox"/> | <a href="#">WP_014546566</a> | 386 | LPFLSYGGSFALVCLFLVGLLMCLRYQGNK-----          | 415 |
| <input checked="" type="checkbox"/> | <a href="#">WP_048435637</a> | 338 | LPFISYGGSSLISLALGMGFLIAITRRRPRTLLN [ 7 ]     | 379 |
| <input checked="" type="checkbox"/> | <a href="#">WP_013127264</a> | 404 | LPLLSAGGNSVILVLFMLGLLAGAAARHEPEAIAAL [ 101 ] | 539 |
| <input checked="" type="checkbox"/> | <a href="#">WP_011522270</a> | 333 | LPLMSYGGSSVLFMFLALGIVMNVRMRRFVN----          | 363 |
| <input checked="" type="checkbox"/> | <a href="#">WP_012683246</a> | 385 | LPFFSYGPSFLLVSWVAVAVLLRISAEGRGQPDAL [ 2 ]    | 421 |
| <input checked="" type="checkbox"/> | <a href="#">WP_010942720</a> | 336 | LPLFSYGGTSMITSMTGIGILLNISMRRFMF----          | 366 |
| <input checked="" type="checkbox"/> | <a href="#">WP_011112575</a> | 337 | LPLISYGGTSMVTILLGFGILMSIHTHPKLVKT--          | 369 |
| <input checked="" type="checkbox"/> | <a href="#">WP_003114090</a> | 334 | LPFISYGGTSLVTLLSGFGVLMMSIHTHRKWIAQV-         | 367 |
| <input checked="" type="checkbox"/> | <a href="#">WP_013066543</a> | 350 | LPMVSYGGTAMMILLAAFGLVQSAHVHRP----R-          | 379 |
| <input checked="" type="checkbox"/> | <a href="#">WP_011744311</a> | 376 | LPFVSYGGSSLLGNMIMVALALNFVHNKR----SI [ 2 ]    | 408 |
| <input checked="" type="checkbox"/> | <a href="#">WP_002853654</a> | 330 | LPFFSYGGSSFTIFMIFFGILQHLLITFRY-----F [ 7 ]   | 366 |
| <input checked="" type="checkbox"/> | <a href="#">WP_009963846</a> | 351 | LPFTSYGGTFLIVCMFLMGMVQSVWIHRNISPVKK [ 13 ]   | 398 |
| <input checked="" type="checkbox"/> | <a href="#">WP_012851903</a> | 369 | LPLVSYGGSATFANMIALGLLQAVHLRARPFPA--          | 401 |
| <input checked="" type="checkbox"/> | <a href="#">WP_010881835</a> | 345 | LPFFSSGGSSIVVTLSLCGLIINVS GDEKIRRE-- [ 7 ]   | 384 |
| <input checked="" type="checkbox"/> | <a href="#">WP_003867927</a> | 336 | LPFISYGGTSTVIMMAGVGILLNISRYANLDRS--          | 368 |
| <input checked="" type="checkbox"/> | <a href="#">WP_012869947</a> | 337 | LPLFSYGGSSLVAEMLALGLVQSVAVESRRERFDL [ 3 ]    | 374 |
| <input checked="" type="checkbox"/> | <a href="#">WP_012639260</a> | 329 | LPLVSYGGTSMVTLAAAFGILMSIHSRRLLAR--           | 361 |

|                                     |                              |     |                                      |      |     |
|-------------------------------------|------------------------------|-----|--------------------------------------|------|-----|
| <input checked="" type="checkbox"/> | <a href="#">WP_013007878</a> | 337 | MPFVSYGGSSLITLCSLCGIVNSIALRRY----DI[ | 2]   | 369 |
| <input checked="" type="checkbox"/> | <a href="#">WP_010919421</a> | 346 | MPMLSYGGTVMLTVMIGFGLIQAVRVHRYTEVTSG[ | 5]   | 385 |
| <input checked="" type="checkbox"/> | <a href="#">WP_012415416</a> | 349 | LPFFSYGGSSFLITMAMMGMLLNISAVENKAD---[ | 3]   | 383 |
| <input checked="" type="checkbox"/> | <a href="#">WP_011564505</a> | 342 | LPFISYGRSSLVSVLSLGLLQSVAMRSRAEVAKH[  | 3]   | 379 |
| <input checked="" type="checkbox"/> | <a href="#">WP_012411137</a> | 346 | LPMFSYGGNSMIASLIAAGLLIRVARESNEAEVVP[ | 20]  | 400 |
| <input checked="" type="checkbox"/> | <a href="#">WP_000131719</a> | 336 | LPLVSYGGSALIVLMAGFGIVMSIHTHRKMLSKSV  |      | 370 |
| <input checked="" type="checkbox"/> | <a href="#">WP_041571869</a> | 357 | VPFYSYGGSSLVANCLAIGMILSISKKAKM-----  |      | 386 |
| <input checked="" type="checkbox"/> | <a href="#">WP_003033307</a> | 357 | LPLISYGGSSLLIMCYTLGVLVRVDFENKLLADTI[ | 10]  | 401 |
| <input checked="" type="checkbox"/> | <a href="#">WP_011014922</a> | 377 | LPMISAGGTSAIITLASMGLLISCARHEPETVSAM[ | 139] | 550 |
| <input checked="" type="checkbox"/> | <a href="#">WP_012583594</a> | 334 | LPFISFARTSLITNYAMLGLIVNIY-----VRG[   | 5]   | 366 |
